# Supplementary material
Source: HighWire-hosted journal article supplement (http://gut.bmj.com/highwire/filestream/192655/field_highwire_adjunct_files/0/5881078webonlyapp1.xls)
Supplement: 5881078webonlyapp1.xls [file 5881078webonlyapp1.xls]

## Sheet: supplementary data 1
SNP ID	CHR	BP_b36	Category SNP	Category SNP	P_HWE ContrR1	all1 R1	all2 R1	CMH R1	OR R1	L95 R1	U95 R1		CMH R1+GWAS	OR R1+GWAS	L95 R1+GWAS	U95 R1+GWAS		A1 GWAS	F_A GWAS	F_U GWAS	A2 GWAS	P GWAS	OR GWAS		A1 UK2	F_A UK2		A2 UK2	P UK2			A1 Irish	F_A Irish	F_U Irish	A2 Irish	P Irish	OR Irish		A1 Dutch	F_A Dutch	F_U Dutch	A2 Dutch	P Dutch	OR Dutch
rs2493285	1	3323455	1	WGAtop2000_noWTCCCassoc	0.3647	A	G	0.03386	0.8519	0.7346	0.9879		0.8602	0.9893	0.8773	1.116		A	0.1087	0.08216	G	0.003635	1.362		A	0.07815	0.09263	G	0.1139			A	0.08333	0.09948	G	0.1736	0.8229		A	0.08755	0.09389	G	0.5739	0.926
rs10915311	1	4968815	1	WGAtop2000_noWTCCCassoc	0.2033	C	A	0.2862	1.047	0.9625	1.138		0.4598	0.974	0.9083	1.044		C	0.3983	0.444	A	0.003687	0.829		C	0.4367	0.4411	A	0.7841	0.9822		C	0.4525	0.4265	A	0.1985	1.111		C	0.4716	0.4509	A	0.2913	1.087
rs6667629	1	10447054	1	WGAtop2000_noWTCCCassoc	0.1997	G	A	0.1112	0.9242	0.8389	1.018		0.002979	0.8845	0.8156	0.9591		G	0.213	0.253	A	0.003048	0.799		G	0.2413	0.2566	A	0.2771			G	0.2404	0.2659	A	0.1513	0.8738		G	0.2378	0.2397	A	0.9108	0.9898
rs1416401	1	18228679	3	WGAtop3000associatedWTCCC	0.2334	A	G	0.488	0.9352	0.7739	1.13		0.04154	0.8459	0.7199	0.9939		A	0.03599	0.05419	G	0.006808	0.6516		A	0.05256		G	0.9747	1.005		A	0.0473	0.04792	G	0.9429	0.9864		A	0.04961	0.05895	G	0.2969	0.8332
rs209736	1	22763996	1	WGAtop2000_noWTCCCassoc	0.4235	G	A	0.8964	0.9941	0.9091	1.087		0.1314	1.059	0.983	1.14		G	0.3252	0.2833	A	0.003643	1.219		G	0.3025	0.3158	A	0.3742	0.9395		G	0.3258	0.324	A	0.925	1.008		G	0.3399	0.3279	A	0.5177	1.055
rs11249201	1	24324986	2	WGArepli_ImmuneGenes	0.576	G	A	0.1153	1.087	0.9798	1.206		0.01152	1.117	1.025	1.217		G	0.2192	0.1909	A	0.02549	1.189		G	0.2093	0.1928	A	0.2019	1.108		G	0.2005	0.1979	A	0.8757	1.016		G	0.2014	0.1844	A	0.2706	1.115
rs11587500	1	24389467	2	WGArepli_ImmuneGenes	0.7807	A	G	0.702	1.016	0.9352	1.105		0.3369	0.9668	0.9024	1.036		G	0.5199	0.4842	A	0.02337	1.154		A	0.4924	0.4975	G	0.753	0.9798		A	0.4842	0.4964	G	0.5503	0.9527		A	0.4844	0.4506	G	0.0822	1.146
rs12131684	1	24440022	2	WGArepli_ImmuneGenes	0.6703	A	G	0.8335	0.9906	0.9073	1.082		0.2874	1.04	0.9673	1.119		A	0.358	0.3255	G	0.02927	1.156		A	0.3409	0.3523	G	0.4622	0.9511		A	0.3183	0.3118	G	0.7302	1.031		A	0.356	0.3548	G	0.9492	1.005
rs6657309	1	29615995	3	WGAtop3000associatedWTCCC	0.2834	A	G	0.7975	0.9869	0.8921	1.092		0.06265	0.9233	0.8488	1.004		A	0.1954	0.2317	G	0.005312	0.8051		A	0.2162	0.2149	G	0.9275	1.007		A	0.2252	0.2141	G	0.505	1.067		A	0.2062	0.2275	G	0.1894	0.8823
rs2358521	1	34154441	1	WGAtop2000_noWTCCCassoc	0.6293	A	G	0.5425	1.027	0.9426	1.119		0.03215	1.081	1.007	1.16		A	0.4158	0.3703	G	0.003006	1.211		A	0.3736	0.373	G	0.9702	1.003		A	0.3671	0.3703	G	0.8704	0.9864		A	0.3986	0.3761	G	0.2365	1.1
rs10888678	1	50282316	1	WGAtop2000_noWTCCCassoc	0.6052	A	G	0.1878	1.127	0.9432	1.347		0.00669	1.223	1.057	1.415		A	0.07207	0.05032	G	0.003179	1.466		A	0.06768	0.05186	G	0.03546	1.327		A	0.04842	0.05052	G	0.8123	0.9564		A	0.05934	0.05944	G	0.9909	0.9981
rs1167998	1	62704220	3	WGAtop3000associatedWTCCC	0.1426	C	A	0.3183	0.9567	0.8771	1.044		0.4645	1.027	0.9561	1.103		C	0.3933	0.3515	A	0.005936	1.196		C	0.352	0.3627	A	0.4929	0.9547		C	0.3559	0.3641	A	0.6738	0.965		C	0.3463	0.3594	A	0.4823	0.9441
rs10889353	1	62890784	3	WGAtop3000associatedWTCCC	0.1979	C	A	0.4561	0.9674	0.8867	1.055		0.3168	1.037	0.9655	1.115		C	0.3914	0.3481	A	0.004316	1.204		C	0.3481	0.3591	A	0.4771	0.9529		C	0.3525	0.3547	A	0.9093	0.9904		C	0.3434	0.3528	A	0.6143	0.9595
rs4409689	1	62949953	3	WGAtop3000associatedWTCCC	0.151	G	A	0.5455	0.9735	0.8924	1.062		0.2703	1.041	0.9691	1.119		G	0.397	0.3541	A	0.004773	1.201		G	0.3467	0.3619	A	0.3251	0.9355		G	0.3502	0.3526	A	0.9023	0.9896		G	0.358	0.3561	A	0.9207	1.008
rs9787151	1	62951726	3	WGAtop3000associatedWTCCC	0.151	G	A	0.5725	0.9753	0.894	1.064		0.2424	1.044	0.9715	1.121		G	0.3978	0.354	A	0.003976	1.206		G	0.3474	0.3619	A	0.3476	0.9383		G	0.3499	0.3526	A	0.8886	0.9881		G	0.3587	0.3561	A	0.8912	1.011
rs12404118	1	66345841	1	WGAtop2000_noWTCCCassoc	0.6319	A	G	0.6189	1.04	0.892	1.212		0.0458	1.137	1.002	1.29		A	0.09472	0.06997	G	0.003594	1.391		A	0.07746	0.07981	G	0.7872	0.968		A	0.06885	0.07031	G	0.8876	0.9776		A	0.09922	0.08389	G	0.1694	1.203
rs7530511	1	67457975	2	WGArepli_ImmuneGenes	0.5164	A	G	0.3549	0.941	0.8273	1.07		0.02512	0.8843	0.794	0.9849		A	0.103	0.1283	G	0.01308	0.7795		A	0.1293	0.1209	G	0.4291	1.08		A	0.09685	0.1094	G	0.3148	0.8732		A	0.1158	0.1383	G	0.0861	0.8154
rs10493722	1	82944582	3	WGAtop3000associatedWTCCC	0.2779	A	G	0.451	0.9489	0.8281	1.087		0.3976	1.049	0.9385	1.173		A	0.1208	0.09494	G	0.007183	1.31		A	0.09738	0.1134	G	0.1112	0.8436		A	0.09685	0.1063	G	0.4464	0.902		A	0.1128	0.1	G	0.2833	1.145
rs321261	1	96235912	1	WGAtop2000_noWTCCCassoc	0.5286	A	G	0.9952	0.9997	0.9174	1.089		0.1002	0.942	0.8772	1.012		A	0.3557	0.4004	G	0.003619	0.8268		A	0.3651	0.3746	G	0.548	0.9604		A	0.3829	0.3823	G	0.9761	1.003		A	0.3852	0.3722	G	0.4929	1.057
rs4364907	1	107505396	1	WGAtop2000_noWTCCCassoc	0.1223	G	A	0.9294	1.004	0.9154	1.102		0.1007	1.066	0.9877	1.15		G	0.3156	0.2736	A	0.003284	1.224		G	0.2873	0.2868	A	0.9752	1.002		G	0.2766	0.2972	A	0.2662	0.9044		G	0.2758	0.2583	A	0.3107	1.094
rs2644608	1	155040653	2	WGArepli_ImmuneGenes	0.08847	G	A	0.7093	0.9843	0.9057	1.07		0.1123	0.9456	0.8826	1.013		G	0.471	0.5081	A	0.01882	0.8621		A	0.5014	0.495	G	0.6932	1.026		A	0.4842	0.4786	G	0.7828	1.023		G	0.4747	0.4772	A	0.8996	0.9902
rs1917534	1	165663895	2	WGArepli_ImmuneGenes	0.2462	A	G	0.3546	0.9612	0.8839	1.045		0.0243	0.9231	0.861	0.9897		A	0.3952	0.4377	G	0.006461	0.8397		A	0.4225	0.4585	G	0.0255	0.8642		A	0.4572	0.4448	G	0.5385	1.051		A	0.4397	0.4283	G	0.5577	1.047
rs1737498	1	165765782	1	WGAtop2000_noWTCCCassoc	0.4482	A	G	0.4202	0.9211	0.7543	1.125		0.01779	0.8172	0.6914	0.966		A	0.03663	0.05696	G	0.003031	0.6295		A	0.04144	0.05114	G	0.16	0.802		A	0.05631	0.06198	G	0.5567	0.903		A	0.03794	0.03	G	0.2549	1.275
rs2176473	1	167598426	1	WGAtop2000_noWTCCCassoc	0.8806	A	G	0.04975	0.9164	0.8398	0.9999		0.000885	0.8848	0.8232	0.951		A	0.3458	0.3914	G	0.002824	0.8219		A	0.3433	0.3672	G	0.1238	0.9007		A	0.3209	0.3312	G	0.5886	0.9542		A	0.3716	0.3933	G	0.2532	0.9121
rs941987	1	172107422	1	WGAtop2000_noWTCCCassoc	0.5181	A	G	0.2203	0.9107	0.7842	1.058		0.5549	1.038	0.9182	1.172		A	0.1015	0.076	G	0.003692	1.374		A	0.08564	0.09227	G	0.4737	0.9213		A	0.08108	0.09115	G	0.3812	0.8798		A	0.07879	0.08444	G	0.5991	0.9274
rs10494494	1	174140762	3	WGAtop3000associatedWTCCC	0.4628	A	G	0.3497	1.059	0.9394	1.193		0.43	0.9607	0.8695	1.061		A	0.1221	0.1533	G	0.004623	0.7682		A	0.1485	0.1395	G	0.4268	1.076		A	0.1414	0.1255	G	0.2461	1.147		A	0.1411	0.1437	G	0.8491	0.9789
rs497915	1	180673277	1	WGAtop2000_noWTCCCassoc	0.9539	A	G	0.9042	1.007	0.9043	1.12		0.1409	0.9351	0.8551	1.023		A	0.1613	0.1973	G	0.003297	0.7827		A	0.1823	0.1849	G	0.8367	0.9829		A	0.1791	0.1807	G	0.9145	0.9887		A	0.1959	0.1872	G	0.5718	1.058
rs338568	1	183044503	1	WGAtop2000_noWTCCCassoc	0.4034	A	C	0.9538	1.003	0.9031	1.114		0.1044	0.9303	0.8525	1.015		A	0.1787	0.2166	C	0.002792	0.7868		A	0.1754	0.1931	C	0.1605	0.8887		A	0.1791	0.1823	C	0.8359	0.9784		A	0.2412	0.2071	C	0.03507	1.217
rs12404187	1	183413897	3	WGAtop3000associatedWTCCC	0.1347	G	A	0.7094	0.9837	0.9021	1.073		0.2795	1.04	0.9683	1.118		G	0.3676	0.3274	A	0.007106	1.194		G	0.3748	0.3554	A	0.2122	1.087		G	0.3593	0.3799	A	0.2972	0.9153		G	0.3632	0.3873	A	0.2065	0.9022
rs2378910	1	183498874	1	WGAtop2000_noWTCCCassoc	0.2543	A	G	0.7692	0.9875	0.9077	1.074		0.2034	1.046	0.9757	1.122		A	0.4293	0.384	G	0.003335	1.207		A	0.4365	0.4066	G	0.06127	1.13		A	0.4155	0.4344	G	0.3483	0.9258		A	0.3969	0.4348	G	0.04974	0.8555
rs1857967	1	207627875	1	WGAtop2000_noWTCCCassoc	0.9589	G	A	0.4069	0.9578	0.8649	1.061		0.328	1.043	0.9589	1.134		G	0.241	0.2032	A	0.003641	1.245		G	0.2023	0.2153	A	0.3265	0.9245		G	0.223	0.2182	A	0.7777	1.028		G	0.2082	0.2133	A	0.7464	0.9694
rs2487911	1	208442772	1	WGAtop2000_noWTCCCassoc	0.7666	A	G	0.1948	1.058	0.9714	1.153		0.5876	0.9805	0.9131	1.053		A	0.3464	0.3906	G	0.003815	0.827		A	0.3821	0.3844	G	0.8847	0.9904		A	0.3844	0.367	G	0.3784	1.077		A	0.3998	0.3689	G	0.1033	1.14
rs10494968	1	212487358	1	WGAtop2000_noWTCCCassoc	0.7715	G	A	0.3906	1.04	0.9505	1.139		0.02105	1.092	1.013	1.177		G	0.3247	0.2822	A	0.003225	1.223		G	0.2918	0.3058	A	0.3476	0.9356		G	0.3142	0.301	A	0.4817	1.064		G	0.322	0.2867	A	0.04857	1.182
rs10158471	1	215522526	3	WGAtop3000associatedWTCCC	0.2807	A	G	0.4989	0.9717	0.8941	1.056		0.2912	1.038	0.9687	1.112		G	0.4679	0.5137	A	0.003638	0.8323		A	0.4869	0.5021	G	0.3456	0.9407		A	0.473	0.4562	G	0.4061	1.07		A	0.4854	0.5033	G	0.3591	0.9308
rs12408234	1	236993444	1	WGAtop2000_noWTCCCassoc	0.4754	A	G	0.6104	0.9706	0.8654	1.089		0.2342	1.059	0.9634	1.165		A	0.169	0.1358	G	0.002988	1.295		A	0.1535	0.1588	G	0.6546	0.9608		A	0.1723	0.1573	G	0.3149	1.116		A	0.144	0.1607	G	0.239	0.8784
rs4313384	1	237014255	1	WGAtop2000_noWTCCCassoc	0.8869	A	G	0.6797	0.9751	0.8651	1.099		0.2037	1.066	0.9657	1.177		A	0.1517	0.1206	G	0.003563	1.304		A	0.1409	0.1438	G	0.7984	0.9766		A	0.1565	0.1427	G	0.3362	1.115		A	0.1255	0.1406	G	0.2594	0.8774
rs946355	1	237725234	1	WGAtop2000_noWTCCCassoc	0.9575	A	G	0.978	1.001	0.9035	1.11		0.09041	1.076	0.9886	1.17		A	0.241	0.2032	G	0.003641	1.245		A	0.2017	0.1954	G	0.6285	1.04		A	0.2151	0.2059	G	0.5793	1.057		A	0.2033	0.2169	G	0.3947	0.9213
rs5020631	1	240908923	3	WGAtop3000associatedWTCCC	0.01228	A	G	0.7785	1.015	0.9163	1.124		0.2021	0.946	0.8686	1.03		A	0.1823	0.2159	G	0.008346	0.81		A	0.2121	0.207	G	0.6968	1.032		A	0.2182	0.2366	G	0.2838	0.9005		A	0.2094	0.1953	G	0.3695	1.091
rs2685244	2	543264	1	WGAtop2000_noWTCCCassoc	0.6685	A	G	0.7395	1.014	0.9324	1.104		0.1698	0.9522	0.8879	1.021		A	0.3874	0.4332	G	0.00323	0.8274		A	0.426	0.4037	G	0.1622	1.096		A	0.4459	0.426	G	0.3222	1.084		A	0.3911	0.4371	G	0.0171	0.8271
rs792084	2	5495663	3	WGAtop3000associatedWTCCC	0.9109	A	G	0.7539	0.9863	0.9048	1.075		0.05955	0.9334	0.8689	1.003		A	0.3393	0.3822	G	0.004786	0.8302		A	0.386	0.3763	G	0.5329	1.042		A	0.3514	0.3589	G	0.6995	0.9678		A	0.3552	0.3726	G	0.3552	0.9274
rs6758730	2	11594900	1	WGAtop2000_noWTCCCassoc	0.5388	G	A	0.0335	0.8777	0.7783	0.9899		0.8535	0.9908	0.8983	1.093		G	0.168	0.1351	A	0.003265	1.292		G	0.1257	0.1431	A	0.1188	0.8611		G	0.1261	0.1443	A	0.1956	0.8561		G	0.152	0.1661	A	0.3283	0.9002
rs6431734	2	15791658	1	WGAtop2000_noWTCCCassoc	0.314	C	A	0.7888	0.9878	0.9029	1.081		0.06529	0.9323	0.8653	1.004		C	0.2918	0.3358	A	0.00277	0.8149		C	0.3011	0.3171	A	0.286	0.9278		C	0.3442	0.3439	A	0.9877	1.001		C	0.3006	0.2812	A	0.2734	1.099
rs4666291	2	21978872	1	WGAtop2000_noWTCCCassoc	0.7674	G	A	0.3302	1.071	0.9331	1.229		0.4796	0.9582	0.8512	1.079		G	0.06836	0.09449	A	0.003217	0.7032		G	0.09807	0.09192	A	0.5152	1.074		G	0.09234	0.1078	A	0.2096	0.8419		G	0.1196	0.09611	A	0.0492	1.278
rs747344	2	23504805	1	WGAtop2000_noWTCCCassoc	0.8855	G	A	0.1398	0.938	0.8616	1.021		0.003768	0.9013	0.84	0.967		G	0.3895	0.436	A	0.002779	0.8251		G	0.4054	0.3941	A	0.4777	1.048		G	0.3837	0.4161	A	0.1053	0.874		G	0.3784	0.4194	A	0.03244	0.8426
rs2164866	2	23525230	1	WGAtop2000_noWTCCCassoc	0.9139	G	A	0.1495	0.9395	0.8629	1.023		0.004329	0.9027	0.8413	0.9685		G	0.3893	0.4355	A	0.003007	0.8263		G	0.4068	0.3937	A	0.4097	1.056		G	0.3829	0.4161	A	0.09506	0.8705		G	0.3784	0.4199	A	0.03058	0.841
rs6740257	2	30431261	1	WGAtop2000_noWTCCCassoc	0.8304	G	A	0.4364	1.059	0.9168	1.223		0.3493	0.9435	0.8353	1.066		G	0.07014	0.09599	A	0.003618	0.7104		G	0.1001	0.09263	A	0.4296	1.09		G	0.09797	0.1021	A	0.7365	0.9554		G	0.07879	0.07071	A	0.4289	1.124
rs3821349	2	42864243	1	WGAtop2000_noWTCCCassoc	0.1762	A	G	0.9018	1.006	0.92	1.099		0.07924	1.068	0.9923	1.149		A	0.3528	0.3096	G	0.003456	1.216		A	0.3646	0.3158	G	0.001367	1.243		A	0.3108	0.3401	G	0.125	0.875		A	0.2758	0.3158	G	0.02588	0.825
rs1014454	2	45472477	3	WGAtop3000associatedWTCCC	1	G	A	0.01952	0.9055	0.8332	0.9842		0.0006591	0.887	0.8278	0.9504		G	0.4659	0.5095	A	0.005731	0.8399		G	0.4689	0.5014	A	0.04459	0.8779		A	0.5124	0.4859	G	0.1924	1.112		G	0.4621	0.4739	A	0.5444	0.9536
rs842639	2	60948749	2	WGArepli_ImmuneGenes	1	G	A	0.0001459	0.8423	0.7709	0.9204		8.005e-006	0.8457	0.7857	0.9103		G	0.3059	0.3411	A	0.01761	0.8515		G	0.3216	0.346	A	0.1111	0.896		G	0.3341	0.3733	A	0.04439	0.8422		G	0.2957	0.3537	A	0.00164	0.7672
rs842647	2	60972975	2	WGArepli_ImmuneGenes	0.6739	G	A	0.0001065	0.8387	0.7673	0.9168		9.256e-006	0.8461	0.7858	0.911		G	0.3041	0.3367	A	0.02741	0.8608		G	0.3151	0.3404	A	0.09767	0.8916		G	0.3198	0.3615	A	0.03128	0.8306		G	0.2957	0.3522	A	0.002142	0.7722
rs10188217	2	61071046	2	WGArepli_ImmuneGenes	1	A	G	0.004332	0.8857	0.8148	0.9627		0.0001028	0.872	0.8138	0.9344		A	0.4524	0.494	G	0.008301	0.8463		A	0.4689	0.4911	G	0.1708	0.915		A	0.4729	0.4958	G	0.2589	0.9123		A	0.4426	0.4905	G	0.01407	0.8247
rs1729657	2	61157506	1	WGAtop2000_noWTCCCassoc	0.5497	A	G	0.006571	0.8899	0.8181	0.968		0.0001	0.8708	0.8121	0.9337		A	0.4055	0.4521	G	0.002893	0.8267		A	0.4372	0.4573	G	0.2102	0.9216		A	0.4088	0.4357	G	0.1796	0.8954		A	0.4027	0.4433	G	0.03581	0.8466
rs1177298	2	61160258	1	WGAtop2000_noWTCCCassoc	0.6731	C	A	0.007497	0.8916	0.8196	0.9698		0.0001143	0.8717	0.8129	0.9347		C	0.4054	0.4522	A	0.002786	0.826		C	0.4391	0.4578	A	0.248	0.9275		C	0.4074	0.4359	A	0.1572	0.89		C	0.4027	0.4427	A	0.03874	0.8488
rs7607266	2	62032768	3	WGAtop3000associatedWTCCC	0.9296	A	G	0.9807	0.9988	0.9095	1.097		0.1275	0.9413	0.8709	1.017		A	0.2523	0.291	G	0.006089	0.822		A	0.2545	0.2811	G	0.06478	0.873		A	0.2636	0.2609	G	0.8827	1.014		A	0.3018	0.2609	G	0.01948	1.224
rs4672473	2	62094290	1	WGAtop2000_noWTCCCassoc	0.8766	C	A	0.02499	1.148	1.017	1.296		0.0005656	1.189	1.078	1.313		C	0.1658	0.1336	A	0.003734	1.289		C	0.1418	0.1302	A	0.294	1.104		C	0.1633	0.1392	A	0.09369	1.207		C	0.1274	0.1139	A	0.2843	1.136
rs1519108	2	66470030	1	WGAtop2000_noWTCCCassoc	0.06629	G	A	0.536	1.029	0.9398	1.127		0.2742	0.9586	0.8886	1.034		G	0.2577	0.2989	A	0.003805	0.8145		G	0.3114	0.2908	A	0.1647	1.103		G	0.2782	0.2922	A	0.4449	0.9335		G	0.3123	0.3094	A	0.8764	1.013
rs7604762	2	66478879	1	WGAtop2000_noWTCCCassoc	0.08456	C	A	0.6943	1.018	0.9312	1.113		0.1817	0.9505	0.8823	1.024		C	0.2763	0.3196	A	0.00286	0.8129		C	0.3283	0.3144	A	0.3583	1.066		C	0.3043	0.3177	A	0.477	0.9393		C	0.3294	0.3255	A	0.8316	1.018
rs4853434	2	79206271	1	WGAtop2000_noWTCCCassoc	0.07837	G	A	0.262	0.9404	0.8445	1.047		0.4898	1.031	0.9447	1.126		G	0.2198	0.1835	A	0.003804	1.253		G	0.1761	0.1981	A	0.08315	0.865		G	0.1914	0.171	A	0.1877	1.148		G	0.1735	0.1933	A	0.1924	0.8758
rs2078520	2	80246156	3	WGAtop3000associatedWTCCC	0.8158	A	G	0.2501	0.928	0.8172	1.054		0.01312	0.8755	0.7881	0.9725		A	0.115	0.1435	G	0.008028	0.7761		A	0.1195	0.1202	G	0.9472	0.9934		A	0.1126	0.1464	G	0.01519	0.7402		A	0.1235	0.1206	G	0.8153	1.028
rs2009094	2	100131509	3	WGAtop3000associatedWTCCC	0.1749	A	G	0.04169	0.9132	0.8367	0.9966		0.00103	0.8857	0.8237	0.9523		A	0.3278	0.3704	G	0.004714	0.8287		A	0.3373	0.3614	G	0.1193	0.8992		A	0.3446	0.3583	G	0.479	0.9415		A	0.3424	0.3641	G	0.246	0.9093
rs1160542	2	100198587	3	WGAtop3000associatedWTCCC	0.1499	G	A	0.003595	1.132	1.041	1.23		6.684e-005	1.151	1.074	1.233		G	0.4923	0.449	A	0.00593	1.19		G	0.4806	0.4639	A	0.2999	1.07		G	0.4764	0.4525	A	0.2377	1.101		G	0.4903	0.4333	A	0.003405	1.258
rs4851274**	2	100237294	3	WGAtop3000associatedWTCCC	0.9676	A	G	0.005535	1.133	1.037	1.238		9.762e-005	1.157	1.075	1.245		A	0.3413	0.3008	G	0.005806	1.204		A	0.3329	0.323	G	0.5138	1.046		A	0.3345	0.3203	G	0.4566	1.066		A	0.3499	0.2856	G	0.0003707	1.347
rs10182025	2	106792492	1	WGAtop2000_noWTCCCassoc	1	A	G	0.07473	1.141	0.9869	1.319		0.7898	0.9838	0.8724	1.109		A	0.07969	0.1076	G	0.002882	0.7182		A	0.09323	0.08119	G	0.1829	1.164		A	0.1104	0.1036	G	0.5858	1.074		A	0.08268	0.07111	G	0.2619	1.177
rs4848300	2	113244377	2	WGArepli_ImmuneGenes	0.8042	G	A	0.1904	1.062	0.9706	1.162		0.8698	0.9938	0.922	1.071		G	0.2808	0.3136	A	0.0235	0.8546		G	0.3198	0.2981	A	0.1473	1.107		G	0.295	0.2964	A	0.9437	0.9937		G	0.3181	0.3068	A	0.5325	1.054
rs1898705	2	119382432	1	WGAtop2000_noWTCCCassoc	1	A	G	0.6931	1.029	0.8926	1.186		0.2041	0.9251	0.8203	1.043		A	0.07262	0.0988	G	0.003637	0.7143		A	0.1022	0.09657	G	0.5586	1.065		A	0.1047	0.09479	G	0.41	1.117		A	0.07782	0.08565	G	0.4675	0.9009
rs1992784	2	134207736	1	WGAtop2000_noWTCCCassoc	0.7194	A	G	0.4672	1.041	0.9342	1.16		0.3057	0.954	0.8719	1.044		A	0.1611	0.1968	G	0.003484	0.7835		A	0.174	0.1742	G	0.9906	0.999		A	0.184	0.1854	G	0.9271	0.9905		A	0.1926	0.1722	G	0.1744	1.147
rs2289959	2	136140374	3	WGAtop3000associatedWTCCC	0.4219	A	G	0.2667	1.077	0.9451	1.227		0.01586	1.141	1.025	1.27		A	0.1356	0.1079	G	0.006498	1.296		A	0.134	0.123	G	0.3096	1.103		A	0.06194	0.07448	G	0.2274	0.8205		A	0.1472	0.1267	G	0.124	1.19
rs2011946	2	136534086	1	WGAtop2000_noWTCCCassoc	0.00624	C	A	0.3852	1.043	0.9482	1.148		0.01842	1.099	1.016	1.188		C	0.2967	0.2553	A	0.003127	1.23		C	0.2781	0.269	A	0.5269	1.047		C	0.1971	0.1932	A	0.8109	1.025		C	0.2938	0.2842	A	0.5888	1.048
rs4662248	2	146071926	1	WGAtop2000_noWTCCCassoc	0.2288	A	G	0.2405	0.9508	0.874	1.034		0.4828	1.025	0.9562	1.099		A	0.4554	0.4089	G	0.00287	1.209		A	0.4544	0.4353	G	0.2335	1.081		A	0.36	0.4161	G	0.004781	0.7893		A	0.4287	0.4444	G	0.4179	0.938
rs1385363	2	146079802	1	WGAtop2000_noWTCCCassoc	0.2428	A	G	0.2665	0.9534	0.8764	1.037		0.4614	1.027	0.9574	1.101		A	0.4555	0.4095	G	0.003185	1.206		A	0.4551	0.4363	G	0.2431	1.079		A	0.3609	0.4166	G	0.005126	0.7907		A	0.43	0.4433	G	0.4906	0.9471
rs1542476	2	164358266	1	WGAtop2000_noWTCCCassoc	0.5976	A	G	0.4046	1.036	0.953	1.127		0.02047	1.085	1.013	1.163		A	0.4582	0.4123	G	0.003273	1.205		A	0.4426	0.4521	G	0.5565	0.9624		A	0.4819	0.4406	G	0.04102	1.181		A	0.4377	0.4327	G	0.7948	1.021
rs16848934	2	164371941	1	WGAtop2000_noWTCCCassoc	0.169	G	A	0.5052	1.042	0.9227	1.177		0.3073	0.9483	0.8565	1.05		G	0.1138	0.1452	A	0.003407	0.7555		G	0.1347	0.1305	A	0.7066	1.037		G	0.1396	0.1277	A	0.3856	1.108		G	0.1401	0.1364	A	0.7858	1.031
rs631051	2	174242091	1	WGAtop2000_noWTCCCassoc	0.05041	A	C	0.03207	1.162	1.013	1.334		0.9113	1.007	0.8964	1.13		A	0.08033	0.1076	C	0.003633	0.7245		A	0.09323	0.1009	C	0.4288	0.9166		A	0.1242	0.09698	C	0.02945	1.32		A	0.1089	0.07778	C	0.005131	1.45
rs3731739	2	179678282	1	WGAtop2000_noWTCCCassoc	0.6473	A	G	0.2791	0.9187	0.7879	1.071		0.01209	0.8457	0.7418	0.9642		A	0.05656	0.08052	G	0.003289	0.6845		A	0.08564	0.08119	G	0.6179	1.06		A	0.08108	0.08385	G	0.8044	0.964		A	0.06323	0.08889	G	0.01529	0.6918
rs1588850	2	180209122	1	WGAtop2000_noWTCCCassoc	0.2477	A	G	0.4755	0.9685	0.8869	1.058		0.02374	0.9193	0.8547	0.9889		A	0.3245	0.3687	G	0.003445	0.8227		A	0.3402	0.3444	G	0.785	0.9815		A	0.3273	0.3462	G	0.3266	0.9189		A	0.3363	0.3387	G	0.8946	0.9891
rs1552332	2	193048522	1	WGAtop2000_noWTCCCassoc	0.01052	C	A	0.1227	1.068	0.9824	1.161		0.003636	1.108	1.034	1.188		C	0.4961	0.4499	A	0.003652	1.204		C	0.4503	0.4531	A	0.8586	0.9885		C	0.4735	0.4588	A	0.4702	1.061		C	0.5068	0.4614	A	0.02027	1.2
rs10427280	2	197597370	1	WGAtop2000_noWTCCCassoc	0.8707	G	A	0.6249	0.9777	0.8932	1.07		0.2418	1.046	0.9703	1.127		G	0.331	0.2874	A	0.002747	1.226		G	0.3116	0.3083	A	0.8237	1.016		G	0.2883	0.286	A	0.9013	1.011		G	0.309	0.3326	A	0.197	0.8972
rs6745249	2	212838816	1	WGAtop2000_noWTCCCassoc	0.4625	G	A	0.4031	1.036	0.9532	1.127		0.01802	1.087	1.014	1.165		G	0.5225	0.4768	A	0.003745	1.201		G	0.4744	0.4807	A	0.6967	0.975		G	0.4943	0.4663	A	0.1727	1.118		G	0.5078	0.4922	A	0.4249	1.065
rs6755375	2	218484617	1	WGAtop2000_noWTCCCassoc	0.3251	A	G	0.2108	0.9458	0.8668	1.032		0.00917	0.9082	0.8447	0.9764		A	0.3237	0.3676	G	0.003561	0.8233		A	0.3488	0.3618	G	0.3989	0.9445		A	0.3288	0.3589	G	0.1207	0.8753		A	0.3609	0.353	G	0.6736	1.035
rs4480974	2	220707578	1	WGAtop2000_noWTCCCassoc	0.1994	A	G	0.5067	0.9629	0.8613	1.077		0.2973	1.05	0.9582	1.15		A	0.196	0.1614	G	0.003747	1.267		A	0.1782	0.1761	G	0.866	1.014		A	0.1464	0.163	G	0.2611	0.8805		A	0.1644	0.1696	G	0.72	0.9631
rs11692006	2	222216559	1	WGAtop2000_noWTCCCassoc	0.2288	G	A	0.05441	1.094	0.9983	1.199		0.0009739	1.136	1.053	1.225		G	0.314	0.2723	A	0.003494	1.223		G	0.2914	0.282	A	0.5201	1.047		G	0.3322	0.2938	A	0.03973	1.196		G	0.2802	0.2656	A	0.4007	1.076
rs8192539	2	233341010	1	WGAtop2000_noWTCCCassoc	0.4927	G	A	0.363	1.05	0.9449	1.168		0.4088	0.9632	0.8813	1.053		G	0.1568	0.1923	A	0.003349	0.781		G	0.1819	0.1795	A	0.851	1.016		G	0.2083	0.1863	A	0.1698	1.149		G	0.1994	0.195	A	0.7762	1.028
rs2215375	2	234621867	1	WGAtop2000_noWTCCCassoc	0.1332	A	G	0.7125	0.9691	0.82	1.145		0.1898	1.094	0.9566	1.251		A	0.09009	0.06598	G	0.003638	1.401		A	0.07459	0.07225	G	0.7812	1.035		A	0.06194	0.06875	G	0.5007	0.8944		A	0.05739	0.06056	G	0.7322	0.9446
rs4663351	2	234642717	1	WGAtop2000_noWTCCCassoc	0.1472	G	A	0.9699	0.9969	0.8469	1.173		0.1135	1.112	0.975	1.269		G	0.09202	0.06751	A	0.003401	1.4		G	0.0808	0.07582	A	0.5653	1.071		G	0.06194	0.07292	A	0.2872	0.8395		G	0.06226	0.05944	A	0.7628	1.05
rs1030891	2	240204702	1	WGAtop2000_noWTCCCassoc	0.04628	G	A	0.5086	0.9594	0.8486	1.085		0.1932	1.068	0.9674	1.179		G	0.1742	0.1403	A	0.002794	1.292		G	0.133	0.142	A	0.4207	0.9267		G	0.152	0.1443	A	0.5891	1.063		G	0.1138	0.1189	A	0.6863	0.9518
rs1177614	3	10201144	2	WGArepli_ImmuneGenes	0.2143	G	A	0.6505	0.9772	0.8843	1.08		0.1162	0.9356	0.8611	1.017		G	0.2072	0.2365	A	0.02669	0.844		G	0.2203	0.2314	A	0.4136	0.9385		G	0.1948	0.2318	A	0.02797	0.802		G	0.25	0.2117	A	0.01898	1.241
rs301558	3	11768181	1	WGAtop2000_noWTCCCassoc	0.6818	A	G	0.2172	0.9469	0.8684	1.033		0.5559	1.022	0.9512	1.097		A	0.3945	0.3505	G	0.003783	1.207		A	0.3412	0.3776	G	0.02	0.8538		A	0.3781	0.3513	G	0.1685	1.123		A	0.3645	0.3806	G	0.3971	0.9337
rs7622113	3	21168370	1	WGAtop2000_noWTCCCassoc	0.2969	G	A	0.6226	0.9793	0.901	1.064		0.03999	0.9302	0.8682	0.9967		G	0.4627	0.5088	A	0.003477	0.8315		G	0.5021	0.4835	A	0.2526	1.077		A	0.492	0.4734	G	0.361	1.077		G	0.4465	0.4778	A	0.1091	0.8818
rs6550578	3	21255054	1	WGAtop2000_noWTCCCassoc	0.3259	A	G	0.1887	0.9453	0.8693	1.028		0.5841	1.02	0.9513	1.093		A	0.4897	0.4439	G	0.003619	1.202		A	0.426	0.4592	G	0.03934	0.8741		A	0.4199	0.4202	G	0.9855	0.9985		A	0.4854	0.4806	G	0.8038	1.02
rs442931	3	21412410	1	WGAtop2000_noWTCCCassoc	0.6222	A	G	0.1754	1.06	0.9745	1.152		0.6243	0.9828	0.917	1.053		A	0.4177	0.4641	G	0.003086	0.8283		A	0.4578	0.4299	G	0.0825	1.12		A	0.4638	0.4766	G	0.5294	0.9501		A	0.4475	0.4289	G	0.3378	1.078
rs1507814	3	21413615	1	WGAtop2000_noWTCCCassoc	0.725	G	A	0.1816	1.059	0.9737	1.151		0.6008	0.9817	0.9159	1.052		G	0.4182	0.4652	A	0.002755	0.8264		G	0.4586	0.4306	A	0.08204	1.12		G	0.4662	0.4791	A	0.5236	0.9494		G	0.4475	0.4294	A	0.3524	1.076
rs17009199	3	21667397	3	WGAtop3000associatedWTCCC	0.6392	A	G	0.824	1.016	0.8865	1.163		0.06936	1.109	0.9919	1.24		A	0.1243	0.09556	G	0.003114	1.344		A	0.1008	0.1081	G	0.4657	0.9253		A	0.09009	0.09948	G	0.4333	0.8963		A	0.1245	0.1012	G	0.05666	1.263
rs10510573	3	26385033	1	WGAtop2000_noWTCCCassoc	0.516	G	A	0.6409	1.022	0.9339	1.117		0.04222	1.08	1.003	1.163		G	0.3331	0.2897	A	0.002828	1.225		G	0.3149	0.3062	A	0.558	1.042		G	0.3029	0.3073	A	0.8155	0.9796		G	0.3278	0.3178	A	0.5823	1.047
rs9810888	3	53610635	1	WGAtop2000_noWTCCCassoc	0.1746	A	C	0.6295	1.021	0.9392	1.109		0.0356	1.077	1.005	1.154		A	0.5251	0.4786	C	0.003174	1.205		A	0.489	0.4968	C	0.6286	0.9692		A	0.465	0.4521	C	0.5228	1.053		A	0.5146	0.4872	C	0.1615	1.116
rs4078007	3	54314019	3	WGAtop3000associatedWTCCC	0.7272	G	A	0.6861	0.9809	0.8933	1.077		0.07186	0.9307	0.8607	1.006		G	0.2361	0.2733	A	0.007356	0.8221		G	0.258	0.2647	A	0.6377	0.9658		G	0.286	0.2875	A	0.9364	0.9929		G	0.2743	0.2744	A	0.9943	0.9994
rs7427716	3	54314616	3	WGAtop3000associatedWTCCC	0.6711	A	G	0.6858	1.027	0.903	1.168		0.2309	0.9367	0.8416	1.043		A	0.105	0.1342	G	0.005091	0.7574		A	0.114	0.1202	G	0.5515	0.9416		A	0.1227	0.1109	G	0.3611	1.121		A	0.1265	0.1172	G	0.4681	1.09
rs1381389	3	55206839	3	WGAtop3000associatedWTCCC	0.405	G	A	0.2567	1.055	0.9617	1.158		0.01036	1.106	1.024	1.195		G	0.2898	0.2493	A	0.003516	1.229		G	0.2895	0.2668	A	0.1171	1.12		G	0.2601	0.2734	A	0.4599	0.9342		G	0.2928	0.2744	A	0.2962	1.095
rs294457	3	59874255	1	WGAtop2000_noWTCCCassoc	0.2404	A	G	0.7715	1.018	0.9026	1.148		0.1533	0.9296	0.8409	1.028		A	0.1221	0.1547	G	0.003157	0.7599		A	0.1388	0.1434	G	0.6834	0.9627		A	0.1419	0.138	G	0.7829	1.033		A	0.1355	0.1276	G	0.5526	1.071
rs9816491	3	77220968	1	WGAtop2000_noWTCCCassoc	0.3034	G	A	0.5772	1.053	0.8782	1.263		0.1997	0.9051	0.7772	1.054		G	0.0437	0.06575	A	0.002764	0.6493		G	0.05939	0.05508	A	0.5641	1.083		G	0.04842	0.06198	A	0.152	0.7702		G	0.05837	0.04444	A	0.1007	1.333
rs11127782	3	82774509	1	WGAtop2000_noWTCCCassoc	0.7466	G	A	0.132	0.8664	0.7189	1.044		0.003794	0.7943	0.6794	0.9286		G	0.04242	0.06399	A	0.003005	0.6479		G	0.04972	0.05687	A	0.3308	0.8678		G	0.04176	0.04792	A	0.4692	0.8659		G	0.05642	0.06667	A	0.2805	0.8371
rs1458001	3	88514151	1	WGAtop2000_noWTCCCassoc	0.438	G	A	0.9398	0.9949	0.8722	1.135		0.1073	1.093	0.9809	1.218		G	0.1305	0.1013	A	0.003274	1.332		G	0.1015	0.122	A	0.04694	0.8128		G	0.1239	0.1094	A	0.2609	1.151		G	0.1177	0.1017	A	0.1854	1.179
rs1007368	3	95443539	1	WGAtop2000_noWTCCCassoc	1	A	G	0.3754	0.9439	0.8309	1.072		0.3643	1.049	0.9456	1.165		A	0.1452	0.115	G	0.003786	1.308		A	0.1257	0.1223	G	0.7515	1.032		A	0.1216	0.1349	G	0.3319	0.888		A	0.107	0.1194	G	0.3184	0.8834
rs2245556	3	102098240	1	WGAtop2000_noWTCCCassoc	0.5717	A	G	0.9399	0.9957	0.8898	1.114		0.1086	0.9259	0.8428	1.017		A	0.1382	0.1719	G	0.00349	0.7721		A	0.168	0.1627	G	0.6579	1.039		A	0.1678	0.1901	G	0.1551	0.859		A	0.1566	0.1433	G	0.3389	1.11
rs10937480	3	104756764	3	WGAtop3000associatedWTCCC	0.4497	G	A	0.4836	0.9635	0.8682	1.069		0.03032	0.909	0.8338	0.991		G	0.1877	0.2224	A	0.006884	0.8078		G	0.1996	0.2031	A	0.7841	0.9781		G	0.1682	0.1693	A	0.9424	0.9922		G	0.2228	0.2367	A	0.3992	0.9244
rs9853928	3	104778074	1	WGAtop2000_noWTCCCassoc	0.3977	A	G	0.5619	0.97	0.8752	1.075		0.02645	0.9078	0.8334	0.9888		A	0.1897	0.2283	G	0.002877	0.7911		A	0.204	0.2077	G	0.7799	0.9778		A	0.1791	0.1773	G	0.9084	1.012		A	0.2305	0.2436	G	0.4313	0.9299
rs9824372	3	104782878	3	WGAtop3000associatedWTCCC	0.5586	G	A	0.4836	0.9637	0.8691	1.069		0.02203	0.9047	0.8304	0.9857		G	0.1909	0.2287	A	0.003512	0.7955		G	0.2023	0.2076	A	0.689	0.9684		G	0.1716	0.1734	A	0.9026	0.9869		G	0.2286	0.2394	A	0.5132	0.9413
rs9834673	3	108985637	1	WGAtop2000_noWTCCCassoc	0.08596	G	A	0.71	0.9843	0.9053	1.07		0.05713	0.935	0.8725	1.002		G	0.4389	0.4845	A	0.003768	0.8323		G	0.4537	0.4581	A	0.7837	0.9823		G	0.4809	0.4635	A	0.3926	1.072		G	0.4241	0.4489	A	0.2019	0.9042
rs1521067	3	115592268	3	WGAtop3000associatedWTCCC	0.3843	A	G	0.3017	1.045	0.9614	1.136		0.01712	1.088	1.015	1.165		A	0.5135	0.4705	G	0.006324	1.188		A	0.4703	0.485	G	0.3632	0.9427		A	0.4752	0.4661	G	0.6539	1.037		G	0.4494	0.5	A	0.009624	0.8163
rs2867837	3	117919139	1	WGAtop2000_noWTCCCassoc	0.26	G	A	0.3199	1.053	0.9509	1.167		0.0153	1.11	1.02	1.209		G	0.2279	0.1907	A	0.003559	1.253		G	0.2169	0.2035	A	0.3099	1.084		G	0.1993	0.2073	A	0.6266	0.952		G	0.2169	0.1989	A	0.2535	1.116
rs1599796	3	120726624	2	WGArepli_ImmuneGenes	0.8166	A	G	0.002407	1.175	1.059	1.304		4.07e-005	1.197	1.099	1.305		A	0.2192	0.1832	G	0.004063	1.251		A	0.2017	0.1806	G	0.09609	1.146		A	0.1993	0.1839	G	0.33	1.105		A	0.2276	0.1885	G	0.01292	1.268
rs2141615	3	123103477	2	WGArepli_ImmuneGenes	0.1738	A	G	0.02756	0.9104	0.8375	0.9897		0.0009626	0.89	0.8304	0.9538		A	0.437	0.4789	G	0.007733	0.8446		A	0.462	0.4696	G	0.6388	0.97		A	0.4043	0.4791	G	0.0002139	0.7378		A	0.4766	0.4728	G	0.8445	1.015
rs745941	3	128127114	1	WGAtop2000_noWTCCCassoc	0.3592	C	A	0.489	1.033	0.9417	1.134		0.02546	1.091	1.011	1.178		C	0.3061	0.2641	A	0.003006	1.229		C	0.2783	0.2761	A	0.879	1.011		C	0.2856	0.2682	A	0.3387	1.09		C	0.2778	0.2759	A	0.9128	1.01
rs1347003	3	128214737	1	WGAtop2000_noWTCCCassoc	0.3046	G	A	0.4759	1.033	0.9442	1.131		0.02283	1.09	1.012	1.174		G	0.3391	0.2968	A	0.003744	1.216		G	0.3071	0.3036	A	0.8193	1.016		G	0.3125	0.3078	A	0.8033	1.022		G	0.3158	0.2978	A	0.317	1.088
rs6773558	3	151861548	1	WGAtop2000_noWTCCCassoc	0.236	G	A	0.7396	0.985	0.9012	1.077		0.1594	1.054	0.9795	1.135		G	0.3488	0.3049	A	0.002874	1.221		G	0.3149	0.3312	A	0.2836	0.9283		G	0.3142	0.3115	A	0.8846	1.013		G	0.3395	0.3322	A	0.6935	1.033
rs2028988	3	162169130	1	WGAtop2000_noWTCCCassoc	0.02263	A	C	0.446	0.9503	0.8336	1.083		0.02363	0.8809	0.7893	0.9833		A	0.09576	0.1248	C	0.003799	0.7425		A	0.105	0.1134	C	0.4077	0.9172		A	0.1126	0.112	C	0.9606	1.006		A	0.1206	0.1263	C	0.6625	0.9493
rs6778365	3	163140078	3	WGAtop3000associatedWTCCC	0.04881	A	C	0.7648	1.016	0.9156	1.127		0.06809	1.083	0.9941	1.18		A	0.2252	0.1895	C	0.004828	1.243		A	0.1957	0.1928	C	0.8186	1.019		A	0.2061	0.1932	C	0.4262	1.084		A	0.2014	0.2091	C	0.6238	0.9535
rs967422	3	165727113	1	WGAtop2000_noWTCCCassoc	0.7719	G	A	0.7803	0.9803	0.8526	1.127		0.06359	0.896	0.7979	1.006		G	0.08763	0.1158	A	0.00367	0.733		G	0.107	0.1102	A	0.7578	0.9684		G	0.08559	0.08854	A	0.7967	0.9635		G	0.09728	0.09222	A	0.6579	1.061
rs7374394	3	186428543	1	WGAtop2000_noWTCCCassoc	0.2327	G	A	0.2467	0.927	0.8153	1.054		0.00933	0.8672	0.7787	0.9656		G	0.09961	0.1297	A	0.003174	0.7421		G	0.1174	0.1298	A	0.2468	0.8916		G	0.116	0.1214	A	0.6839	0.95		G	0.1158	0.1218	A	0.6339	0.9439
rs10937354	3	189744764	1	WGAtop2000_noWTCCCassoc	0.3116	A	G	0.9978	0.9999	0.92	1.087		0.1114	0.9455	0.8824	1.013		A	0.4459	0.493	G	0.002811	0.8276		A	0.4634	0.4789	G	0.3376	0.9397		A	0.473	0.4666	G	0.7542	1.026		A	0.4893	0.4694	G	0.3077	1.083
rs4687150	3	191763578	2	WGArepli_ImmuneGenes	0.5199	A	G	0.2817	1.049	0.9618	1.143		0.0268	1.084	1.009	1.165		A	0.3802	0.3432	G	0.01442	1.174		A	0.3736	0.3593	G	0.3595	1.063		A	0.3333	0.3203	G	0.4931	1.061		A	0.3949	0.3956	G	0.9744	0.9974
rs11915384	3	191853458	2	WGArepli_ImmuneGenes	1	G	A	0.8025	0.9782	0.8227	1.163		0.2571	1.085	0.9423	1.249		G	0.07584	0.05731	A	0.01629	1.35		G	0.05939	0.07015	A	0.1823	0.837		G	0.06757	0.06146	A	0.5367	1.107		G	0.05739	0.05167	A	0.516	1.118
rs6817353	4	5292472	1	WGAtop2000_noWTCCCassoc	0.07016	G	A	0.6008	1.051	0.8719	1.267		0.02771	1.178	1.018	1.363		G	0.08559	0.06153	A	0.002811	1.427		G	0.04489	0.05365	A	0.2174	0.8291		G	0.05856	0.05729	A	0.8935	1.023		G	0.05934	0.04	A	0.01946	1.514
rs1281117	4	8246605	1	WGAtop2000_noWTCCCassoc	0.708	A	G	0.6116	0.9778	0.8966	1.066		0.2242	1.045	0.9732	1.123		A	0.4042	0.3597	G	0.003537	1.208		A	0.3515	0.3561	G	0.7665	0.9801		A	0.388	0.3823	G	0.7724	1.024		A	0.3395	0.3583	G	0.3128	0.9204
rs6843251	4	11482728	3	WGAtop3000associatedWTCCC	0.278	G	A	0.743	0.9859	0.9056	1.073		0.2109	1.046	0.9748	1.122		G	0.413	0.3702	A	0.005384	1.197		G	0.3866	0.4188	A	0.0433	0.8748		G	0.3998	0.3869	A	0.5144	1.056		G	0.4152	0.3928	A	0.2421	1.098
rs1158971	4	20475684	3	WGAtop3000associatedWTCCC	0.5502	G	A	0.0649	1.084	0.995	1.181		0.9095	1.004	0.9353	1.078		G	0.3586	0.3994	A	0.00791	0.8409		G	0.404	0.3705	A	0.03333	1.152		G	0.3637	0.3453	A	0.3415	1.084		G	0.393	0.3893	A	0.8473	1.016
rs3822223	4	25931004	1	WGAtop2000_noWTCCCassoc	0.7438	A	C	0.2576	0.9166	0.7883	1.066		0.008758	0.8466	0.7473	0.959		A	0.07584	0.103	C	0.003047	0.7144		A	0.0739	0.09299	C	0.03587	0.7783		A	0.08352	0.0875	C	0.7271	0.9504		A	0.08967	0.07842	C	0.2961	1.158
rs13128291	4	28499076	1	WGAtop2000_noWTCCCassoc	0.2886	C	A	0.8634	1.007	0.9263	1.096		0.1421	0.9492	0.8854	1.018		C	0.4036	0.4496	A	0.003243	0.8284		C	0.4206	0.4459	A	0.1147	0.9019		C	0.4605	0.4432	A	0.3926	1.072		C	0.4387	0.411	A	0.1513	1.12
rs6813096	4	31538984	1	WGAtop2000_noWTCCCassoc	0.2538	A	G	0.8383	1.011	0.907	1.128		0.07373	1.086	0.9921	1.189		A	0.187	0.1526	G	0.00326	1.277		A	0.1903	0.172	G	0.142	1.131		A	0.1644	0.1682	G	0.801	0.9729		A	0.1754	0.1919	G	0.2801	0.8961
rs1916299	4	31564752	1	WGAtop2000_noWTCCCassoc	0.2067	A	G	0.2134	1.115	0.9389	1.324		0.5621	0.9578	0.8277	1.108		A	0.0444	0.06646	G	0.002929	0.6527		A	0.06906	0.05436	G	0.05476	1.29		A	0.09009	0.07292	G	0.1153	1.259		A	0.03502	0.05117	G	0.04703	0.6729
rs13117332	4	45611289	1	WGAtop2000_noWTCCCassoc	0.4438	G	A	0.2657	0.9525	0.8744	1.038		0.4841	1.026	0.9555	1.101		G	0.4158	0.3706	A	0.003241	1.209		G	0.3771	0.3973	A	0.2008	0.9183		G	0.3547	0.3697	A	0.4449	0.9374		G	0.4047	0.4044	A	0.9907	1.001
rs1504497	4	45643201	3	WGAtop3000associatedWTCCC	0.6393	G	A	0.06343	0.9224	0.847	1.005		0.9555	0.998	0.9301	1.071		G	0.4254	0.3842	A	0.007609	1.187		G	0.3854	0.4062	A	0.1882	0.9164		G	0.3547	0.3781	A	0.2327	0.9041		G	0.4134	0.4294	A	0.4069	0.9364
rs2726277	4	66591322	1	WGAtop2000_noWTCCCassoc	0.1826	A	G	0.4017	1.056	0.9297	1.199		0.3324	0.949	0.8537	1.055		A	0.1073	0.1378	G	0.00367	0.7521		A	0.1257	0.118	G	0.4673	1.074		A	0.1363	0.1224	G	0.3045	1.131		A	0.1099	0.1133	G	0.7821	0.9662
rs6851997	4	74898150	2	WGArepli_ImmuneGenes	0.331	G	A	0.5356	1.027	0.9438	1.118		0.3141	0.9646	0.8993	1.035		G	0.3862	0.4258	A	0.0108	0.8486		G	0.4151	0.4127	A	0.8842	1.01		G	0.4009	0.4141	A	0.5096	0.9469		G	0.4212	0.3906	A	0.1098	1.136
rs6819442	4	77058132	2	WGArepli_ImmuneGenes	0.5673	A	G	0.7614	0.9866	0.9041	1.077		0.07876	0.9368	0.8711	1.008		A	0.3091	0.3509	G	0.005025	0.8276		A	0.3405	0.3426	G	0.888	0.9904		A	0.3198	0.3385	G	0.3275	0.9187		A	0.3862	0.3756	G	0.5752	1.046
rs11098964	4	81106993	3	WGAtop3000associatedWTCCC	0.8072	A	G	0.4214	1.035	0.952	1.125		0.03824	1.076	1.004	1.153		A	0.4916	0.4504	G	0.008765	1.18		A	0.4806	0.4642	G	0.3123	1.068		A	0.455	0.4797	G	0.2222	0.9054		A	0.4932	0.4717	G	0.271	1.09
rs1035191	4	87896281	1	WGAtop2000_noWTCCCassoc	0.5848	C	A	0.5758	0.9741	0.8886	1.068		0.02987	0.9191	0.8517	0.9918		C	0.2725	0.3147	A	0.003485	0.8157		C	0.2742	0.2893	A	0.2988	0.9278		C	0.3081	0.3031	A	0.7891	1.024		C	0.2811	0.2867	A	0.7502	0.9727
rs7681405	4	101778363	1	WGAtop2000_noWTCCCassoc	1	A	G	0.2961	0.9366	0.8284	1.059		0.01048	0.8753	0.7903	0.9693		A	0.1194	0.1519	G	0.003007	0.7567		A	0.1333	0.1438	G	0.3507	0.9158		A	0.1284	0.1354	G	0.6098	0.9404		A	0.1245	0.1285	G	0.7609	0.9648
rs2725769	4	105975618	3	WGAtop3000associatedWTCCC	0.643	A	G	0.7004	1.018	0.929	1.116		0.05708	1.076	0.9978	1.161		A	0.3072	0.2658	G	0.003517	1.225		A	0.2756	0.2758	G	0.989	0.999		A	0.3138	0.326	G	0.5179	0.9452		A	0.2957	0.2711	G	0.161	1.129
rs7685312	4	138033753	1	WGAtop2000_noWTCCCassoc	0.9164	A	G	0.5382	1.027	0.9442	1.116		0.02752	1.081	1.009	1.159		A	0.5071	0.4599	G	0.002753	1.208		A	0.4775	0.4852	G	0.6363	0.9696		A	0.4456	0.4429	G	0.8936	1.011		A	0.5157	0.486	G	0.1302	1.126
rs10030060	4	142714710	2	WGArepli_ImmuneGenes	0.8028	G	A	0.2783	1.126	0.9085	1.396		0.03254	1.209	1.016	1.439		G	0.05077	0.03657	A	0.02407	1.409		G	0.04006	0.04006	A	0.9998	0.9999		G	0.04505	0.03906	A	0.457	1.16		G	0.03696	0.02889	A	0.2392	1.29
rs11731491	4	146966354	1	WGAtop2000_noWTCCCassoc	0.1028	A	G	0.8868	1.012	0.8587	1.193		0.1256	0.8975	0.7814	1.031		A	0.05277	0.0763	G	0.003039	0.6744		A	0.05663	0.05834	G	0.821	0.9689		A	0.0991	0.08906	G	0.3927	1.125		A	0.06128	0.06556	G	0.6553	0.9306
rs4516736	4	147433362	1	WGAtop2000_noWTCCCassoc	0.9365	A	G	0.3336	1.045	0.9562	1.141		0.3875	0.968	0.8993	1.042		A	0.2924	0.3361	G	0.002965	0.8161		A	0.328	0.3209	G	0.6383	1.033		A	0.3435	0.3115	G	0.09128	1.157		A	0.3337	0.342	G	0.6504	0.9632
rs1902498	4	156136025	1	WGAtop2000_noWTCCCassoc	0.7643	A	G	0.8229	0.9902	0.9081	1.08		0.06751	0.9351	0.8703	1.005		A	0.3329	0.3769	G	0.003654	0.8249		A	0.3653	0.3619	G	0.8278	1.015		A	0.3609	0.3686	G	0.6922	0.9671		A	0.3609	0.366	G	0.7877	0.9783
rs7684974	4	166163749	1	WGAtop2000_noWTCCCassoc	0.1702	A	C	0.161	0.9392	0.8604	1.025		0.7225	1.013	0.9424	1.089		A	0.3773	0.3335	C	0.003674	1.211		A	0.3605	0.353	C	0.6288	1.033		A	0.2894	0.3391	C	0.008912	0.7939		A	0.3502	0.3661	C	0.3964	0.9331
rs751322	4	172828490	1	WGAtop2000_noWTCCCassoc	1	G	A	0.346	0.9057	0.737	1.113		0.01448	0.8078	0.6805	0.9588		G	0.03535	0.0552	A	0.003276	0.6271		G	0.04558	0.04975	A	0.5482	0.9122		G	0.04167	0.04797	A	0.4586	0.8629		G	0.03599	0.03722	A	0.8672	0.9657
rs1454746	4	187121330	1	WGAtop2000_noWTCCCassoc	0.5991	G	A	0.5955	1.023	0.9409	1.112		0.03655	1.077	1.005	1.154		G	0.5155	0.4693	A	0.003467	1.203		G	0.464	0.4492	A	0.3598	1.061		G	0.4244	0.464	A	0.0501	0.8517		G	0.4922	0.4572	A	0.07255	1.151
rs7726612	5	3873646	1	WGAtop2000_noWTCCCassoc	0.619	C	A	0.8992	1.008	0.8949	1.135		0.1471	0.9292	0.8414	1.026		C	0.1215	0.1542	A	0.002976	0.7582		C	0.1487	0.1491	A	0.9685	0.9964		C	0.1453	0.1344	A	0.4361	1.095		C	0.1401	0.1407	A	0.9628	0.9948
rs860987	5	4906391	3	WGAtop3000associatedWTCCC	0.02071	G	A	0.06154	1.126	0.9942	1.274		0.9464	0.9965	0.8988	1.105		G	0.115	0.1449	A	0.005536	0.7673		G	0.1279	0.1178	A	0.3353	1.099		G	0.1453	0.1189	A	0.05099	1.26		G	0.1333	0.1263	A	0.5922	1.064
rs2650374	5	4912166	3	WGAtop3000associatedWTCCC	0.0212	G	A	0.06165	1.125	0.9941	1.274		0.9742	0.9983	0.9006	1.107		G	0.1157	0.1449	A	0.00668	0.7722		G	0.1278	0.1178	A	0.3435	1.097		G	0.1464	0.1193	A	0.04532	1.266		G	0.1333	0.1267	A	0.6145	1.06
rs274645	5	6839308	1	WGAtop2000_noWTCCCassoc	0.8885	A	G	0.7578	1.019	0.9052	1.147		0.1281	0.9258	0.8383	1.022		A	0.1189	0.1515	G	0.002842	0.7555		A	0.1471	0.1484	G	0.9081	0.9895		A	0.1408	0.1443	G	0.8052	0.9717		A	0.1449	0.1389	G	0.6565	1.051
rs4702781	5	11055126	1	WGAtop2000_noWTCCCassoc	0.4046	A	G	0.6921	1.018	0.9331	1.11		0.04263	1.077	1.002	1.156		A	0.4145	0.3695	G	0.003322	1.208		A	0.3715	0.3768	G	0.738	0.9779		A	0.3615	0.3578	G	0.8503	1.016		A	0.3482	0.3239	G	0.186	1.115
rs3822735	5	35835751	2	WGArepli_ImmuneGenes	0.4717	A	G	0.09109	1.081	0.9876	1.184		0.003338	1.119	1.038	1.205		A	0.3344	0.2947	G	0.006497	1.202		A	0.3191	0.2879	G	0.03552	1.159		A	0.2815	0.2734	G	0.6555	1.041		A	0.3103	0.3088	G	0.9337	1.007
rs6897932	5	35910332	2	WGArepli_ImmuneGenes	1	A	G	0.2153	0.9426	0.8586	1.035		0.01654	0.9091	0.8409	0.9828		A	0.2426	0.2757	G	0.0174	0.8416		A	0.2707	0.2715	G	0.9589	0.9963		A	0.2432	0.2844	G	0.02265	0.8089		A	0.2821	0.29	G	0.6552	0.9621
rs884344	5	37859997	3	WGAtop3000associatedWTCCC	0.1796	C	A	0.1464	1.073	0.9757	1.18		0.7243	0.9859	0.9108	1.067		C	0.2281	0.2669	A	0.004735	0.812		C	0.2562	0.2446	A	0.4079	1.064		C	0.2579	0.2474	A	0.551	1.057		C	0.2792	0.2589	A	0.2402	1.109
rs6899257	5	42992453	1	WGAtop2000_noWTCCCassoc	0.6197	A	G	0.1469	0.9395	0.8635	1.022		0.7005	1.014	0.9456	1.087		A	0.4666	0.4202	G	0.003009	1.207		A	0.4144	0.4306	G	0.31	0.9356		A	0.3826	0.4208	G	0.05562	0.8529		A	0.4464	0.4406	G	0.7638	1.024
rs11574780	5	55279795	2	WGArepli_ImmuneGenes	0.8202	G	A	0.5756	1.061	0.8618	1.307		0.5035	0.9418	0.7899	1.123		G	0.03213	0.0443	A	0.04889	0.7162		G	0.0442	0.03612	A	0.1969	1.234		G	0.04955	0.04323	A	0.4536	1.154		G	0.03307	0.04278	A	0.2012	0.7654
rs715180	5	55333056	2	WGArepli_ImmuneGenes	0.02551	C	A	0.7665	1.025	0.8725	1.203		0.2864	0.9299	0.8135	1.063		C	0.06435	0.08333	A	0.02368	0.7565		C	0.074	0.07082	A	0.7038	1.049		C	0.08559	0.0875	A	0.867	0.9761		C	0.06031	0.05722	A	0.736	1.057
rs10045084	5	55369682	2	WGArepli_ImmuneGenes	0.2802	G	A	0.4103	0.9637	0.8824	1.052		0.05544	0.9311	0.8655	1.002		G	0.3226	0.3562	A	0.02507	0.8609		G	0.3494	0.3383	A	0.4696	1.05		G	0.3352	0.3609	A	0.185	0.8928		G	0.3051	0.3261	A	0.2482	0.9071
rs538776	5	58218944	1	WGAtop2000_noWTCCCassoc	1	G	A	0.09536	0.8844	0.7655	1.022		0.7588	1.019	0.9058	1.145		G	0.1138	0.08621	A	0.00302	1.361		G	0.08726	0.1027	A	0.1077	0.8351		G	0.08937	0.08934	A	0.9983	1		G	0.08852	0.099	A	0.3612	0.8839
rs2371382	5	65739015	1	WGAtop2000_noWTCCCassoc	0.835	A	G	0.3816	0.96	0.876	1.052		0.01565	0.9102	0.8433	0.9824		A	0.2596	0.301	G	0.003726	0.8145		A	0.2728	0.304	G	0.03421	0.8588		A	0.3104	0.2953	G	0.4181	1.074		A	0.285	0.2889	G	0.8269	0.9813
rs4527553	5	65899491	1	WGAtop2000_noWTCCCassoc	0.9095	A	G	0.4309	0.9578	0.8603	1.066		0.2672	1.051	0.9626	1.148		A	0.2147	0.1783	G	0.003341	1.26		A	0.1865	0.1921	G	0.6596	0.9642		A	0.1768	0.176	G	0.9608	1.005		A	0.1829	0.1919	G	0.5563	0.9426
rs11952144	5	67010788	1	WGAtop2000_noWTCCCassoc	0.3637	A	G	0.1292	0.8931	0.7717	1.034		0.5915	1.032	0.9189	1.16		A	0.1234	0.09459	G	0.002853	1.347		A	0.07942	0.09514	G	0.08949	0.8206		A	0.09685	0.09792	G	0.9292	0.9879		A	0.08463	0.09389	G	0.4091	0.8923
rs7700475	5	107186057	1	WGAtop2000_noWTCCCassoc	1	A	G	0.3377	1.057	0.9439	1.183		0.01246	1.126	1.026	1.236		A	0.1832	0.1487	G	0.002965	1.283		A	0.174	0.1624	G	0.3336	1.087		A	0.1543	0.162	G	0.6044	0.9438		A	0.1569	0.1428	G	0.3085	1.117
rs9327072	5	117782596	3	WGAtop3000associatedWTCCC	0.1045	G	A	0.6535	0.98	0.8974	1.07		0.2858	1.041	0.9673	1.119		G	0.3425	0.302	A	0.005742	1.204		G	0.3253	0.343	A	0.2471	0.9235		G	0.3423	0.3563	A	0.473	0.9406		G	0.3385	0.3192	A	0.293	1.091
rs790155	5	127526279	3	WGAtop3000associatedWTCCC	0.8105	G	A	0.1144	1.081	0.9814	1.19		0.7815	0.9887	0.9123	1.071		G	0.2198	0.2584	A	0.004366	0.8083		G	0.2638	0.2362	A	0.04776	1.159		G	0.2354	0.2453	A	0.567	0.9469		G	0.249	0.2306	A	0.2667	1.107
rs790154	5	127529134	3	WGAtop3000associatedWTCCC	0.8857	A	G	0.1524	1.073	0.9743	1.182		0.6987	0.9842	0.9081	1.067		A	0.2198	0.2581	G	0.004722	0.8098		A	0.2625	0.2361	G	0.05809	1.152		A	0.2336	0.2469	G	0.4451	0.9296		A	0.2495	0.2308	G	0.2605	1.108
rs6596004	5	130575064	2	WGArepli_ImmuneGenes	0.2946	A	C	0.3843	0.9564	0.8651	1.057		0.05313	0.9207	0.8467	1.001		A	0.1954	0.2254	C	0.02046	0.8345		A	0.2189	0.2251	C	0.6454	0.9647		A	0.2286	0.2193	C	0.5802	1.055		A	0.2082	0.2294	C	0.1902	0.8829
rs31551	5	135303229	2	WGArepli_ImmuneGenes	0.3174	A	G	0.8795	1.007	0.9239	1.097		0.2628	0.9601	0.894	1.031		A	0.3515	0.3843	G	0.03158	0.8685		A	0.3812	0.3752	G	0.7005	1.026		A	0.3863	0.3776	G	0.6604	1.037		A	0.3648	0.3776	G	0.4966	0.9464
rs2428158	5	135341751	2	WGArepli_ImmuneGenes	0.3684	A	G	0.4209	1.039	0.9461	1.142		0.06153	1.077	0.9964	1.165		A	0.2751	0.2458	G	0.03337	1.164		A	0.2735	0.2636	G	0.4899	1.052		A	0.2404	0.2573	G	0.3382	0.9136		A	0.2899	0.265	G	0.1536	1.132
rs3756325	5	140349043	1	WGAtop2000_noWTCCCassoc	0.9678	A	G	0.03647	1.099	1.006	1.201		0.0007667	1.134	1.054	1.221		A	0.3458	0.3024	G	0.003167	1.219		A	0.3204	0.314	G	0.6697	1.03		A	0.3232	0.312	G	0.5519	1.053		A	0.3638	0.3133	G	0.006096	1.253
rs7735993	5	140659543	1	WGAtop2000_noWTCCCassoc	0.586	G	A	0.1215	0.9268	0.8417	1.02		0.002801	0.885	0.8168	0.9589		G	0.2252	0.2651	A	0.003538	0.8058		G	0.2465	0.269	A	0.1152	0.8894		G	0.2736	0.2625	A	0.5341	1.058		G	0.2072	0.2397	A	0.04745	0.8289
rs11167753	5	140969594	3	WGAtop3000associatedWTCCC	0.7675	G	A	0.03553	0.9048	0.8243	0.9933		0.0007675	0.8749	0.8094	0.9458		G	0.2426	0.2797	A	0.007774	0.8247		G	0.27	0.2985	A	0.05238	0.8693		G	0.3063	0.3087	A	0.9003	0.989		G	0.2286	0.2592	A	0.07019	0.8471
rs325238	5	143106283	3	WGAtop3000associatedWTCCC	0.853	A	G	0.106	0.9312	0.854	1.015		0.8346	1.008	0.9384	1.082		A	0.4233	0.3792	G	0.004223	1.202		A	0.3677	0.3769	G	0.5595	0.9616		A	0.3142	0.3745	G	0.00191	0.7652		A	0.3852	0.3733	G	0.5307	1.052
rs17653341	5	148313057	1	WGAtop2000_noWTCCCassoc	0.6469	A	G	0.7661	1.026	0.8644	1.219		0.1857	0.9055	0.7814	1.049		A	0.04129	0.06299	G	0.002672	0.6407		A	0.06146	0.0515	G	0.1768	1.206		A	0.06644	0.05885	G	0.4356	1.138		A	0.06323	0.07833	G	0.1371	0.7942
rs164721	5	150711605	1	WGAtop2000_noWTCCCassoc	0.0277	C	A	0.6556	1.023	0.9269	1.128		0.2183	0.9498	0.8751	1.031		C	0.2057	0.2447	A	0.00328	0.799		C	0.2355	0.2296	A	0.6667	1.034		C	0.2455	0.2422	A	0.8493	1.018		C	0.2305	0.2256	A	0.7608	1.029
rs27341	5	156612154	2	WGArepli_ImmuneGenes	0.4414	G	A	0.9241	1.004	0.922	1.094		0.225	0.9571	0.8916	1.027		G	0.3677	0.4028	A	0.0228	0.8623		G	0.3702	0.3926	A	0.154	0.9092		G	0.3804	0.388	A	0.6984	0.9681		G	0.4134	0.3744	A	0.0408	1.177
rs2170901	5	161840216	3	WGAtop3000associatedWTCCC	0.9714	G	A	0.5825	0.9765	0.8972	1.063		0.3121	1.037	0.9666	1.112		G	0.4338	0.3917	A	0.006562	1.19		G	0.4047	0.3976	A	0.6564	1.03		G	0.402	0.3983	A	0.8525	1.016		G	0.4027	0.4411	A	0.04714	0.8543
rs1469683	5	168421911	1	WGAtop2000_noWTCCCassoc	0.7358	G	A	0.4547	1.071	0.8951	1.281		0.02852	1.177	1.017	1.362		G	0.07207	0.05063	A	0.0037	1.456		G	0.05387	0.05158	A	0.7507	1.047		G	0.05743	0.05156	A	0.5201	1.121		G	0.06518	0.0634	A	0.8532	1.03
rs12515514	5	174105970	1	WGAtop2000_noWTCCCassoc	0.2349	A	G	0.5118	0.9696	0.884	1.063		0.2705	1.044	0.9673	1.126		A	0.3201	0.2774	G	0.002963	1.226		A	0.2742	0.2953	G	0.1501	0.9015		A	0.2873	0.2883	G	0.9571	0.9952		A	0.2846	0.277	G	0.6668	1.038
rs9381324	6	44515875	1	WGAtop2000_noWTCCCassoc	0.423	G	A	0.7095	0.9565	0.7572	1.208		0.04436	0.8191	0.6741	0.9954		G	0.02638	0.04395	A	0.003474	0.5894		G	0.03591	0.03541	A	0.933	1.015		G	0.02703	0.03021	A	0.6415	0.8918		G	0.03016	0.03444	A	0.5384	0.8716
rs6901147	6	52562258	1	WGAtop2000_noWTCCCassoc	0.5511	A	G	0.0783	1.082	0.9911	1.182		0.001817	1.123	1.044	1.208		A	0.365	0.3207	G	0.002903	1.218		A	0.3377	0.3219	G	0.2978	1.074		A	0.339	0.3229	G	0.3996	1.075		A	0.3463	0.3267	G	0.2868	1.092
rs672822	6	52952144	1	WGAtop2000_noWTCCCassoc	0.5971	G	A	0.543	1.046	0.9054	1.208		0.2093	0.9259	0.8209	1.044		G	0.07786	0.1051	A	0.003268	0.7187		G	0.09669	0.08941	A	0.4369	1.09		G	0.1115	0.1073	A	0.7397	1.044		G	0.07004	0.07444	A	0.6646	0.9364
rs222461	6	52997234	1	WGAtop2000_noWTCCCassoc	0.9622	C	A	0.524	1.032	0.9369	1.137		0.2514	0.9542	0.8806	1.034		C	0.2275	0.2672	A	0.003767	0.8076		C	0.2517	0.2471	A	0.743	1.025		C	0.2365	0.238	A	0.9292	0.9916		C	0.2519	0.2378	A	0.3981	1.08
rs1410692	6	70242690	3	WGAtop3000associatedWTCCC	0.2316	G	A	0.2952	1.048	0.9596	1.145		0.01299	1.097	1.02	1.18		G	0.358	0.3179	A	0.006917	1.197		G	0.3472	0.3258	A	0.1621	1.1		G	0.3187	0.3066	A	0.5185	1.058		G	0.3307	0.3326	A	0.9199	0.9917
rs9341357	6	72703112	3	WGAtop3000associatedWTCCC	0.2969	G	A	0.3736	0.9622	0.8839	1.047		0.02404	0.9221	0.8593	0.9894		G	0.3734	0.4142	A	0.008237	0.8428		G	0.4137	0.4113	A	0.8817	1.01		G	0.3739	0.3922	A	0.354	0.9254		G	0.3988	0.4178	A	0.3246	0.9246
rs1457960	6	77397031	1	WGAtop2000_noWTCCCassoc	0.216	A	G	0.8432	0.9916	0.9117	1.078		0.06329	0.9361	0.873	1.004		A	0.4303	0.4775	G	0.002962	0.8265		A	0.4467	0.4496	G	0.861	0.9887		A	0.4313	0.4198	G	0.5658	1.048		A	0.4134	0.4289	G	0.4233	0.9385
rs13209604	6	110283236	1	WGAtop2000_noWTCCCassoc	0.5887	A	C	0.293	1.09	0.9283	1.28		0.4773	0.952	0.8313	1.09		A	0.0547	0.07806	C	0.003658	0.6834		A	0.07735	0.07511	C	0.7938	1.032		A	0.0777	0.0756	C	0.8452	1.03		A	0.06712	0.05222	C	0.102	1.306
rs332635	6	124791424	1	WGAtop2000_noWTCCCassoc	0.4343	A	G	0.0546	0.9065	0.8201	1.002		0.001478	0.8734	0.8034	0.9495		A	0.1954	0.2342	G	0.002992	0.7941		A	0.2231	0.2339	G	0.4265	0.9404		A	0.2072	0.1974	G	0.5459	1.063		A	0.216	0.2633	G	0.004898	0.7705
rs1889979	6	124817749	1	WGAtop2000_noWTCCCassoc	0.8346	A	G	0.1807	0.9447	0.8692	1.027		0.006354	0.9083	0.8477	0.9733		A	0.4524	0.4986	G	0.0034	0.831		A	0.4814	0.476	G	0.7424	1.022		A	0.4786	0.4969	G	0.3669	0.9293		A	0.4475	0.4817	G	0.07964	0.8715
rs584197	6	124842312	1	WGAtop2000_noWTCCCassoc	0.1096	G	A	0.2514	0.9428	0.8526	1.043		0.01008	0.8956	0.8234	0.9742		G	0.1909	0.2296	A	0.002832	0.7915		G	0.2231	0.2289	A	0.6671	0.9672		G	0.2027	0.1934	A	0.5653	1.06		G	0.2169	0.2481	A	0.0611	0.8398
rs10484797	6	137485375	2	WGArepli_ImmuneGenes	0.9301	G	A	0.837	1.014	0.8893	1.156		0.1832	0.9286	0.8326	1.036		G	0.1005	0.128	A	0.007026	0.7614		G	0.1229	0.1069	A	0.1179	1.17		G	0.09797	0.1053	A	0.5516	0.9227		G	0.1148	0.1261	A	0.3761	0.8986
rs72761	6	137496152	2	WGArepli_ImmuneGenes	0.7265	G	A	0.9042	1.005	0.9246	1.093		0.1449	1.053	0.9824	1.128		G	0.4664	0.4286	A	0.01603	1.165		G	0.4489	0.4528	A	0.8106	0.9845		G	0.473	0.4714	A	0.9363	1.007		G	0.4747	0.4606	A	0.4698	1.058
rs2327832	6	138014761	3	WGAtop3000associatedWTCCC	0.7584	G	A	0.0006309	1.186	1.076	1.309		6.607e-006	1.204	1.11	1.305		G	0.2667	0.2266	A	0.002934	1.241		G	0.2562	0.229	A	0.04865	1.16		G	0.2551	0.2078	A	0.005157	1.305		G	0.229	0.2069	A	0.1682	1.139
rs2327935	6	139532786	1	WGAtop2000_noWTCCCassoc	0.3506	A	G	0.02892	0.9056	0.8284	0.9899		0.0006671	0.8797	0.8171	0.9471		A	0.3033	0.3465	G	0.003661	0.8213		A	0.2999	0.3299	G	0.04711	0.8701		A	0.3525	0.342	G	0.588	1.047		A	0.3093	0.342	G	0.07528	0.8615
rs6917010	6	149440204	1	WGAtop2000_noWTCCCassoc	0.2042	A	G	0.9704	1.002	0.9188	1.092		0.08492	1.065	0.9914	1.143		A	0.4072	0.3623	G	0.00336	1.209		A	0.3873	0.3663	G	0.1804	1.094		A	0.3589	0.3734	G	0.4592	0.9394		A	0.3613	0.3735	G	0.5207	0.9491
rs4870255	6	154279630	1	WGAtop2000_noWTCCCassoc	0.08385	A	C	0.275	1.069	0.9483	1.205		0.01011	1.139	1.031	1.257		A	0.1555	0.1238	C	0.003206	1.304		A	0.1492	0.1356	C	0.2256	1.118		A	0.1377	0.1276	C	0.4611	1.092		A	0.1413	0.1406	C	0.9549	1.006
rs2016588	6	159345695	1	WGAtop2000_noWTCCCassoc	0.4607	G	A	0.01478	1.112	1.021	1.211		0.0003285	1.138	1.061	1.221		G	0.4129	0.3675	A	0.00312	1.21		G	0.4012	0.3734	A	0.07677	1.125		G	0.4302	0.4222	A	0.6921	1.033		G	0.3823	0.3478	A	0.0659	1.161
rs212402*	6	159392283	3	WGAtop3000associatedWTCCC	0.91	G	A	0.004929	1.131	1.038	1.233		8.101e-005	1.154	1.075	1.239		G	0.3996	0.3541	A	0.002794	1.214		G	0.3847	0.3649	A	0.2056	1.088		G	0.4063	0.3809	A	0.199	1.113		G	0.3772	0.3343	A	0.0214	1.206
rs169858	6	159404764	3	WGAtop3000associatedWTCCC	0.11	A	G	0.1057	1.076	0.9846	1.176		0.003282	1.116	1.037	1.202		A	0.349	0.3052	G	0.002941	1.22		A	0.3177	0.3125	G	0.7282	1.025		A	0.3784	0.3604	G	0.3582	1.08		A	0.3129	0.2853	G	0.1227	1.141
rs220723	6	160246557	1	WGAtop2000_noWTCCCassoc	0.1377	A	G	0.7822	1.014	0.9196	1.118		0.06216	1.08	0.9961	1.17		A	0.2629	0.2231	G	0.003026	1.242		A	0.2545	0.2561	G	0.9107	0.9917		A	0.2286	0.2318	G	0.853	0.9823		A	0.2305	0.2156	G	0.3555	1.09
rs3777414	6	160381075	1	WGAtop2000_noWTCCCassoc	0.4193	G	A	0.5344	0.9726	0.8908	1.062		0.2572	1.043	0.9698	1.121		G	0.3605	0.3175	A	0.003778	1.212		G	0.3225	0.3335	A	0.4724	0.9516		G	0.3468	0.3516	A	0.8075	0.9795		G	0.358	0.355	A	0.8737	1.013
rs1779	7	873265	1	WGAtop2000_noWTCCCassoc	0.3562	A	G	0.1213	1.07	0.9823	1.165		0.7338	0.9878	0.92	1.06		A	0.353	0.3987	G	0.003091	0.8228		A	0.3859	0.3913	G	0.7333	0.9776		A	0.4108	0.3786	G	0.104	1.144		A	0.3969	0.3637	G	0.08004	1.151
rs300532	7	4908710	1	WGAtop2000_noWTCCCassoc	0.02886	A	G	0.4648	0.963	0.8704	1.065		0.02908	0.9108	0.8374	0.9905		A	0.1973	0.2363	G	0.002953	0.7944		A	0.2192	0.2289	G	0.4749	0.9459		A	0.1948	0.2083	G	0.4087	0.9194		A	0.2237	0.2178	G	0.7129	1.035
rs372454	7	4912701	1	WGAtop2000_noWTCCCassoc	0.02374	G	A	0.8708	1.007	0.9265	1.094		0.07988	1.064	0.9927	1.139		G	0.5257	0.4793	A	0.003215	1.204		G	0.5014	0.4921	A	0.5678	1.038		A	0.5146	0.4859	G	0.1572	1.122		G	0.4874	0.4683	A	0.3283	1.08
rs7826	7	5004009	1	WGAtop2000_noWTCCCassoc	0.6092	A	G	0.6653	0.9806	0.8972	1.072		0.1807	1.052	0.9769	1.132		A	0.3446	0.3008	G	0.002951	1.222		A	0.3174	0.3329	G	0.3102	0.9321		A	0.3488	0.3448	G	0.8389	1.018		A	0.3161	0.3085	G	0.6713	1.036
rs1880242	7	22726132	2	WGArepli_ImmuneGenes	0.3292	C	A	0.2682	1.048	0.9644	1.139		0.02221	1.084	1.012	1.161		C	0.5077	0.468	A	0.01167	1.173		C	0.4862	0.4839	A	0.8873	1.009		C	0.4921	0.487	A	0.8001	1.021		C	0.4786	0.4505	A	0.1494	1.12
rs1554606	7	22735232	2	WGArepli_ImmuneGenes	0.2467	A	C	0.7604	1.013	0.9319	1.101		0.1343	1.054	0.9838	1.13		A	0.4762	0.4423	C	0.0309	1.146		A	0.4495	0.4621	C	0.437	0.9507		A	0.4482	0.4453	C	0.8863	1.012		A	0.463	0.4388	C	0.213	1.103
rs2722380	7	24342667	1	WGAtop2000_noWTCCCassoc	0.07131	G	A	0.6832	0.9824	0.9023	1.07		0.06123	0.9349	0.8713	1.003		G	0.3805	0.4255	A	0.003711	0.8293		G	0.3942	0.4037	A	0.5482	0.961		G	0.4553	0.4222	A	0.1025	1.144		G	0.3619	0.3889	A	0.1542	0.8911
rs1859817	7	25425219	1	WGAtop2000_noWTCCCassoc	0.124	C	A	0.08003	0.9137	0.8258	1.011		0.8792	1.006	0.9262	1.094		C	0.2449	0.2064	A	0.003276	1.247		C	0.2033	0.2149	A	0.3788	0.9321		C	0.2365	0.2427	A	0.7199	0.9664		C	0.1955	0.228	A	0.04344	0.8228
rs7794304	7	28394916	1	WGAtop2000_noWTCCCassoc	0.4856	G	A	0.5143	0.9726	0.8948	1.057		0.2653	1.04	0.9706	1.114		G	0.5167	0.4708	A	0.003571	1.202		G	0.4627	0.475	A	0.4482	0.952		G	0.4899	0.4708	A	0.3478	1.079		G	0.4532	0.4733	A	0.3042	0.9225
rs6462302	7	31782981	1	WGAtop2000_noWTCCCassoc	0.04309	A	G	0.5648	0.9637	0.8499	1.093		0.0439	0.8962	0.8055	0.9971		A	0.09395	0.1234	G	0.003174	0.7365		A	0.1093	0.1246	G	0.1455	0.8622		A	0.1501	0.1401	G	0.4818	1.084		A	0.1226	0.1218	G	0.9523	1.007
rs6462620	7	35654895	1	WGAtop2000_noWTCCCassoc	0.8885	C	A	0.4413	0.9677	0.8899	1.052		0.02163	0.9219	0.8601	0.9882		C	0.4232	0.469	A	0.003622	0.8309		C	0.4536	0.4331	A	0.2019	1.087		C	0.4189	0.4322	A	0.5077	0.947		C	0.4562	0.5078	A	0.00834	0.8133
rs921916	7	50199244	1	WGAtop2000_noWTCCCassoc	0.04677	G	A	0.3456	0.948	0.8484	1.059		0.4076	1.039	0.9487	1.139		G	0.1928	0.1575	A	0.002898	1.277		G	0.1616	0.1778	A	0.1864	0.8916		G	0.1779	0.1755	A	0.8763	1.017		G	0.1634	0.1672	A	0.7939	0.9729
rs6950779	7	51114044	3	WGAtop3000associatedWTCCC	0.4725	C	A	0.03283	0.9116	0.8373	0.9925		0.001205	0.8896	0.8288	0.9549		C	0.3645	0.4051	A	0.008694	0.8421		C	0.3812	0.3995	A	0.2476	0.926		C	0.3908	0.4097	A	0.3416	0.9241		C	0.4018	0.4311	A	0.1282	0.8862
rs6460557	7	69879234	1	WGAtop2000_noWTCCCassoc	0.7628	G	A	0.8698	0.9898	0.8751	1.119		0.1388	1.079	0.9756	1.194		G	0.151	0.1196	A	0.003147	1.309		G	0.1257	0.1352	A	0.3858	0.9196		G	0.1385	0.1423	A	0.7868	0.9688		G	0.1304	0.12	A	0.4214	1.099
rs12538568	7	70188207	1	WGAtop2000_noWTCCCassoc	0.5536	A	C	0.8251	0.9906	0.9114	1.077		0.164	1.05	0.9802	1.125		A	0.5206	0.4743	C	0.003339	1.204		A	0.4723	0.4878	C	0.3369	0.9396		A	0.4661	0.438	C	0.1637	1.12		A	0.4843	0.5028	C	0.3466	0.9289
rs37609	7	73539675	1	WGAtop2000_noWTCCCassoc	0.1312	A	G	0.8608	0.9921	0.9077	1.084		0.08785	0.9378	0.8711	1.01		A	0.3046	0.3477	G	0.003698	0.8217		A	0.3287	0.3262	G	0.8667	1.012		A	0.3036	0.3234	G	0.2942	0.912		A	0.3327	0.3241	G	0.6381	1.04
rs10278476	7	76475377	1	WGAtop2000_noWTCCCassoc	0.846	A	G	0.4993	1.031	0.9441	1.125		0.3109	0.9629	0.8949	1.036		A	0.2967	0.3396	G	0.003683	0.8203		A	0.3508	0.3301	G	0.1759	1.097		A	0.366	0.3422	G	0.2187	1.11		A	0.3152	0.3432	G	0.1289	0.8809
rs1558699	7	77930588	1	WGAtop2000_noWTCCCassoc	0.4268	A	G	0.5443	1.027	0.9431	1.117		0.02939	1.081	1.008	1.159		A	0.4524	0.4072	G	0.003724	1.203		A	0.4288	0.4181	G	0.5047	1.045		A	0.3902	0.4103	G	0.314	0.9194		A	0.3959	0.375	G	0.271	1.092
rs258688	7	81589143	1	WGAtop2000_noWTCCCassoc	0.01459	G	A	0.3361	0.9599	0.883	1.043		0.4168	1.029	0.9602	1.103		G	0.4883	0.4414	A	0.003038	1.208		G	0.457	0.4599	A	0.8557	0.9882		G	0.4617	0.4687	A	0.7294	0.9722		G	0.4698	0.4961	A	0.179	0.9001
rs1522545	7	94187775	1	WGAtop2000_noWTCCCassoc	0.3465	C	A	0.374	0.953	0.857	1.06		0.01545	0.8967	0.8209	0.9795		C	0.1733	0.2101	A	0.003433	0.7884		C	0.1776	0.1884	A	0.3954	0.9307		C	0.2032	0.1993	A	0.8109	1.025		C	0.1849	0.2031	A	0.2428	0.8901
rs194867	7	103576965	1	WGAtop2000_noWTCCCassoc	0.4936	A	C	0.9192	1.004	0.9229	1.093		0.1019	0.9431	0.8791	1.012		A	0.3792	0.4255	C	0.002835	0.8248		A	0.395	0.4095	C	0.362	0.9415		A	0.4077	0.3672	C	0.03993	1.186		A	0.427	0.445	C	0.3546	0.9296
rs2299408	7	103578852	1	WGAtop2000_noWTCCCassoc	0.4494	A	G	0.92	1.004	0.9228	1.093		0.1013	0.943	0.879	1.012		A	0.3798	0.4262	G	0.002806	0.8247		A	0.3957	0.4102	G	0.3613	0.9415		A	0.4077	0.3672	G	0.03993	1.186		A	0.427	0.445	G	0.3546	0.9296
rs1404915	7	110059663	3	WGAtop3000associatedWTCCC	0.07631	A	C	0.4615	0.9692	0.8919	1.053		0.3102	1.036	0.9673	1.11		C	0.4691	0.5148	A	0.003796	0.8329		C	0.5014	0.495	A	0.6931	1.026		C	0.5225	0.4865	A	0.07551	1.155		A	0.5	0.4833	C	0.3937	1.069
rs977480	7	112091403	1	WGAtop2000_noWTCCCassoc	0.5248	G	A	0.6991	1.018	0.9313	1.112		0.0551	1.074	0.9984	1.156		G	0.3509	0.3082	A	0.003823	1.213		G	0.3336	0.3228	A	0.4798	1.05		G	0.3172	0.3071	A	0.5922	1.048		G	0.3288	0.3465	A	0.3392	0.9239
rs1229758	7	114016375	1	WGAtop2000_noWTCCCassoc	0.7511	G	A	0.5666	1.025	0.9425	1.114		0.03462	1.078	1.005	1.155		G	0.4844	0.4382	A	0.003413	1.205		G	0.4682	0.4463	A	0.175	1.092		G	0.4291	0.4266	A	0.9012	1.01		G	0.4416	0.4483	A	0.7326	0.9735
rs207210	7	130186017	1	WGAtop2000_noWTCCCassoc	0.8304	C	A	0.2838	0.9548	0.8774	1.039		0.01015	0.9119	0.85	0.9784		C	0.3689	0.4141	A	0.003423	0.8271		C	0.4219	0.4274	A	0.7293	0.9776		C	0.3818	0.3812	A	0.9795	1.002		C	0.4144	0.4482	A	0.08117	0.8711
rs1477228	7	131106103	3	WGAtop3000associatedWTCCC	0.3373	A	G	0.1934	1.08	0.9619	1.212		0.0113	1.132	1.028	1.246		A	0.162	0.1322	G	0.007	1.268		A	0.1333	0.1466	G	0.2376	0.895		A	0.1892	0.1719	G	0.264	1.124		A	0.1608	0.1272	G	0.01316	1.315
rs9692533	7	132105787	1	WGAtop2000_noWTCCCassoc	0.3358	C	A	0.3396	1.06	0.9403	1.195		0.3716	0.955	0.8632	1.057		C	0.1112	0.1431	A	0.002763	0.749		C	0.1494	0.1418	A	0.5077	1.063		C	0.1396	0.1354	A	0.762	1.036		C	0.1355	0.1285	A	0.5959	1.063
rs11760312	7	142871814	3	WGAtop3000associatedWTCCC	0.09471	G	A	0.2778	1.076	0.9423	1.229		0.01052	1.153	1.034	1.286		G	0.1293	0.09986	A	0.002846	1.339		G	0.1064	0.1045	A	0.8527	1.02		G	0.116	0.0849	A	0.008884	1.414		G	0.1206	0.1268	A	0.6319	0.9445
rs6464211	7	151504786	1	WGAtop2000_noWTCCCassoc	0.3567	A	G	0.1993	1.079	0.9604	1.213		0.5673	0.9717	0.8804	1.072		A	0.1163	0.148	G	0.003433	0.7576		A	0.1623	0.1456	G	0.1493	1.137		A	0.1509	0.125	G	0.06033	1.244		A	0.142	0.1581	G	0.2517	0.8813
rs2710201	7	152555826	1	WGAtop2000_noWTCCCassoc	1	G	A	0.1856	0.8876	0.7437	1.059		0.6378	1.036	0.8948	1.199		G	0.0662	0.04571	A	0.00372	1.48		G	0.0587	0.06366	A	0.5251	0.9172		G	0.04842	0.0464	A	0.8141	1.046		G	0.06323	0.07889	A	0.1241	0.7881
rs1457186	8	4584209	1	WGAtop2000_noWTCCCassoc	0.7152	G	A	0.1325	1.075	0.9783	1.181		0.003397	1.124	1.039	1.215		G	0.2787	0.2377	A	0.002775	1.239		G	0.2659	0.2675	A	0.9088	0.9916		G	0.288	0.2443	A	0.01405	1.251		G	0.2588	0.2531	A	0.7383	1.03
rs2407592	8	4597753	1	WGAtop2000_noWTCCCassoc	0.7266	G	A	0.1329	0.9378	0.8626	1.02		0.003471	0.9018	0.8414	0.9665		G	0.4364	0.4831	A	0.002962	0.8283		G	0.4344	0.4499	A	0.3342	0.9389		G	0.4257	0.4516	A	0.1991	0.9002		G	0.4786	0.4839	A	0.785	0.9789
rs6991080	8	4612685	1	WGAtop2000_noWTCCCassoc	0.8619	G	A	0.111	0.9344	0.8597	1.016		0.00292	0.9005	0.8404	0.9648		G	0.4672	0.5141	A	0.002968	0.829		G	0.4633	0.4767	A	0.4078	0.9477		G	0.4526	0.4818	A	0.1502	0.8894		A	0.4971	0.4889	G	0.6747	1.033
rs10111155	8	4613968	1	WGAtop2000_noWTCCCassoc	0.5905	A	G	0.05666	0.9207	0.8457	1.002		0.001058	0.889	0.8286	0.9539		A	0.3856	0.4314	G	0.003182	0.8271		A	0.3854	0.4012	G	0.3166	0.9357		A	0.3761	0.4036	G	0.1654	0.8907		A	0.4173	0.4367	G	0.3173	0.9239
rs1454953	8	13360354	3	WGAtop3000associatedWTCCC	0.6269	A	G	0.7915	1.019	0.8871	1.17		0.0947	1.101	0.9834	1.234		A	0.1189	0.09388	G	0.008981	1.302		A	0.105	0.09162	G	0.1621	1.163		A	0.09234	0.1057	G	0.2747	0.8605		A	0.1021	0.1046	G	0.8391	0.9742
rs7814428	8	13368810	3	WGAtop3000associatedWTCCC	0.4402	A	G	0.8088	0.9818	0.846	1.139		0.1404	1.095	0.9706	1.235		A	0.1097	0.08257	G	0.00301	1.369		A	0.08633	0.07838	G	0.3688	1.111		A	0.07788	0.09115	G	0.2463	0.8421		A	0.08949	0.09389	G	0.6977	0.9486
rs10503700	8	21084492	1	WGAtop2000_noWTCCCassoc	0.3347	A	C	0.39	1.047	0.9427	1.163		0.3828	0.9617	0.8809	1.05		A	0.169	0.2054	C	0.003424	0.7867		A	0.1992	0.1946	C	0.7202	1.03		A	0.2106	0.1818	C	0.07081	1.201		A	0.18	0.1889	C	0.557	0.9424
rs2613675	8	21095515	3	WGAtop3000associatedWTCCC	0.8643	G	A	0.4329	1.037	0.9465	1.137		0.3559	0.9647	0.8938	1.041		G	0.2606	0.3016	A	0.004136	0.8163		G	0.2956	0.2979	A	0.874	0.9888		G	0.2804	0.2531	A	0.1262	1.15		G	0.3025	0.2967	A	0.7432	1.028
rs1459320	8	21181308	1	WGAtop2000_noWTCCCassoc	0.7523	A	C	0.7423	1.016	0.9244	1.117		0.1878	0.9487	0.877	1.026		A	0.2404	0.2813	C	0.003335	0.8084		A	0.2756	0.2738	C	0.9035	1.009		A	0.2421	0.2244	C	0.3004	1.104		A	0.2724	0.2789	C	0.7094	0.9679
rs10503717	8	22634817	1	WGAtop2000_noWTCCCassoc	0.6715	C	A	0.3578	0.9551	0.866	1.053		0.0162	0.9048	0.834	0.9817		C	0.2124	0.2516	A	0.003496	0.802		C	0.2458	0.2482	A	0.8651	0.9873		C	0.2167	0.2252	A	0.6137	0.9516		C	0.2349	0.2528	A	0.2886	0.9075
rs1354817	8	59283676	1	WGAtop2000_noWTCCCassoc	0.01805	A	G	0.4862	0.9709	0.8933	1.055		0.2866	1.038	0.969	1.112		G	0.4621	0.5084	A	0.003276	0.8305		G	0.5	0.4989	A	0.9472	1.004		A	0.5023	0.4948	G	0.7131	1.03		A	0.4543	0.4878	G	0.0864	0.8742
rs6471690	8	59286840	1	WGAtop2000_noWTCCCassoc	0.01644	G	A	0.5222	0.9732	0.8955	1.058		0.2661	1.04	0.9706	1.114		A	0.4621	0.5084	G	0.003276	0.8305		A	0.4993	0.4989	G	0.9811	1.002		G	0.5023	0.4943	A	0.6939	1.032		G	0.4543	0.4872	A	0.09153	0.8761
rs11775081	8	59292359	1	WGAtop2000_noWTCCCassoc	0.01804	G	A	0.5584	0.9754	0.8975	1.06		0.2469	1.042	0.9722	1.116		A	0.4621	0.5084	G	0.003276	0.8305		A	0.4986	0.4989	G	0.9848	0.9988		G	0.5023	0.4943	A	0.6939	1.032		G	0.4552	0.4872	A	0.1013	0.8793
rs10808759	8	69314054	1	WGAtop2000_noWTCCCassoc	0.5849	G	A	0.9409	0.9968	0.9154	1.085		0.107	1.06	0.9875	1.137		G	0.4273	0.3814	A	0.003211	1.21		G	0.3819	0.4049	A	0.1473	0.9083		G	0.4074	0.39	A	0.3794	1.076		G	0.3988	0.3804	A	0.3337	1.08
rs3919902	8	72184730	3	WGAtop3000associatedWTCCC	1	A	G	0.3917	0.9642	0.8872	1.048		0.01831	0.9201	0.8585	0.986		A	0.4472	0.4929	G	0.004002	0.8324		A	0.4599	0.4742	G	0.376	0.9442		A	0.4831	0.4922	G	0.6548	0.9643		A	0.4971	0.5006	G	0.8588	0.9862
rs1481812	8	72212959	1	WGAtop2000_noWTCCCassoc	0.05175	A	G	0.1107	0.8867	0.7649	1.028		0.003974	0.8326	0.735	0.9433		A	0.06774	0.09335	G	0.003535	0.7057		A	0.07735	0.09478	G	0.05845	0.8007		A	0.08446	0.1	G	0.1917	0.8303		A	0.09533	0.085	G	0.3528	1.134
rs6987092	8	79964625	2	WGArepli_ImmuneGenes	0.9138	G	A	0.01983	1.128	1.019	1.249		0.5608	1.026	0.9419	1.117		G	0.1799	0.2117	A	0.01197	0.8172		G	0.2106	0.1981	A	0.3368	1.08		G	0.2117	0.2115	A	0.9878	1.002		G	0.2422	0.1933	A	0.002183	1.334
rs1401861	8	89295752	3	WGAtop3000associatedWTCCC	0.1916	A	G	0.1126	1.122	0.9731	1.294		0.7585	0.9814	0.8706	1.106		A	0.07519	0.1013	G	0.004233	0.7216		A	0.1024	0.07976	G	0.01354	1.316		A	0.09347	0.09167	G	0.8781	1.022		A	0.0963	0.09556	G	0.9482	1.009
rs2543090	8	97166430	1	WGAtop2000_noWTCCCassoc	0.1843	A	G	0.2323	1.067	0.9595	1.186		0.00646	1.128	1.034	1.23		A	0.2287	0.1904	G	0.002675	1.261		A	0.1874	0.1872	G	0.9857	1.001		A	0.1971	0.162	G	0.02227	1.27		A	0.2076	0.2028	G	0.7598	1.03
rs871561	8	103810932	1	WGAtop2000_noWTCCCassoc	0.6783	G	A	0.145	1.069	0.9771	1.17		0.003529	1.118	1.037	1.206		G	0.3	0.2583	A	0.003011	1.231		G	0.3191	0.2954	A	0.1123	1.118		G	0.3086	0.2696	A	0.03268	1.209		G	0.3123	0.3306	A	0.3172	0.9195
rs7814470	8	124022172	3	WGAtop3000associatedWTCCC	0.5073	G	A	0.96	1.002	0.9153	1.098		0.125	1.061	0.9838	1.143		G	0.3258	0.2862	A	0.006291	1.205		G	0.2954	0.2933	A	0.8844	1.01		G	0.3108	0.3083	A	0.8949	1.012		G	0.2986	0.2994	A	0.9641	0.9962
rs6998423	8	134058472	1	WGAtop2000_noWTCCCassoc	0.03921	A	G	0.6774	1.018	0.9343	1.11		0.04996	1.074	1	1.154		A	0.3862	0.3421	G	0.003509	1.21		A	0.3757	0.3719	G	0.8072	1.016		A	0.3725	0.3635	G	0.6485	1.039		A	0.3658	0.3632	G	0.891	1.011
rs2252807	8	134132094	1	WGAtop2000_noWTCCCassoc	0.1991	A	G	0.2962	1.049	0.9587	1.148		0.01206	1.101	1.021	1.186		A	0.313	0.2713	G	0.003438	1.224		A	0.3087	0.2978	G	0.4624	1.053		A	0.3232	0.3034	G	0.2925	1.096		A	0.2996	0.2987	G	0.9579	1.005
rs3739262	8	134274895	3	WGAtop3000associatedWTCCC	0.5637	A	G	0.4003	0.9616	0.8777	1.053		0.03421	0.9216	0.8546	0.994		A	0.2828	0.3209	G	0.008794	0.8344		A	0.3066	0.2958	G	0.4644	1.053		A	0.3002	0.3219	G	0.2512	0.9039		A	0.2704	0.2881	G	0.3151	0.9159
rs11780467	8	138268410	1	WGAtop2000_noWTCCCassoc	0.812	G	A	0.4759	1.04	0.9338	1.158		0.02691	1.105	1.011	1.207		G	0.2063	0.1709	A	0.003709	1.261		G	0.175	0.1702	A	0.6992	1.034		G	0.1802	0.1766	A	0.8156	1.025		G	0.2023	0.1961	A	0.6897	1.04
rs10465031	9	8023596	1	WGAtop2000_noWTCCCassoc	0.591	C	A	0.6379	1.035	0.8961	1.196		0.2106	0.9253	0.8195	1.045		C	0.07326	0.09972	A	0.003442	0.7137		C	0.09267	0.09371	A	0.9125	0.9878		C	0.07545	0.07708	A	0.8797	0.9771		C	0.106	0.09298	A	0.2613	1.157
rs1434262	9	8693733	3	WGAtop3000associatedWTCCC	0.2082	A	G	0.9909	1.001	0.9181	1.09		0.137	0.9473	0.8821	1.017		A	0.3483	0.3899	G	0.006416	0.8362		A	0.3654	0.3711	G	0.7186	0.976		A	0.3939	0.3754	G	0.3484	1.081		A	0.386	0.3959	G	0.6038	0.9592
rs6477405	9	9710279	3	WGAtop3000associatedWTCCC	0.8562	C	A	0.3679	1.04	0.9552	1.132		0.01998	1.087	1.013	1.166		C	0.4261	0.3827	A	0.005098	1.198		C	0.4122	0.4099	A	0.8852	1.01		C	0.3962	0.3878	A	0.6726	1.036		C	0.4066	0.391	A	0.414	1.067
rs10756104	9	10713877	1	WGAtop2000_noWTCCCassoc	0.1025	G	A	0.7013	0.982	0.8948	1.078		0.2023	1.051	0.9735	1.135		G	0.2957	0.254	A	0.00288	1.233		G	0.2887	0.2854	A	0.8234	1.016		G	0.2968	0.2991	A	0.9049	0.9894		G	0.2393	0.2561	A	0.3207	0.9137
rs2209278	9	12696652	1	WGAtop2000_noWTCCCassoc	1	A	G	0.01078	0.7906	0.6599	0.9473		0.0001649	0.7464	0.6408	0.8694		A	0.0437	0.06549	G	0.003066	0.6521		A	0.05062	0.06774	G	0.02852	0.7338		A	0.04638	0.06348	G	0.0723	0.7175		A	0.06031	0.06396	G	0.7002	0.9393
rs7866165	9	13802685	1	WGAtop2000_noWTCCCassoc	0.2616	A	C	0.7555	0.985	0.8959	1.083		0.1406	1.061	0.9807	1.148		A	0.2728	0.2321	C	0.002705	1.242		A	0.2538	0.2509	C	0.8361	1.016		A	0.2827	0.2818	C	0.9613	1.004		A	0.2471	0.2606	C	0.4295	0.9313
rs452158	9	16988232	3	WGAtop3000associatedWTCCC	0.1832	G	A	0.8005	0.9888	0.9064	1.079		0.06429	0.9339	0.8685	1.004		G	0.3147	0.3586	A	0.003319	0.8211		G	0.353	0.373	A	0.1996	0.9169		G	0.3514	0.3141	A	0.04995	1.183		G	0.3566	0.3729	A	0.388	0.9319
rs10964284	9	19771086	1	WGAtop2000_noWTCCCassoc	0.7809	A	G	0.0745	0.927	0.8529	1.008		0.8714	1.006	0.9387	1.078		G	0.4518	0.4986	A	0.002983	0.8288		G	0.5125	0.4932	A	0.2346	1.08		G	0.5135	0.4812	A	0.1113	1.138		A	0.4572	0.4694	G	0.53	0.9519
rs1051922	9	21067716	2	WGArepli_ImmuneGenes	0.03769	A	G	0.6094	1.023	0.9369	1.118		0.05556	1.074	0.9983	1.155		A	0.3567	0.3161	G	0.00622	1.2		A	0.3294	0.3208	G	0.5701	1.04		A	0.3465	0.3542	G	0.6927	0.9669		A	0.3298	0.3233	G	0.7255	1.03
rs10757612	9	26541726	1	WGAtop2000_noWTCCCassoc	0.6761	A	C	0.102	0.9295	0.8515	1.015		0.003504	0.8972	0.8342	0.965		A	0.3156	0.3593	C	0.003528	0.8223		A	0.3488	0.3576	C	0.5702	0.9622		A	0.3205	0.3401	C	0.3071	0.9153		A	0.3346	0.3622	C	0.1395	0.8855
rs2589054	9	27433802	1	WGAtop2000_noWTCCCassoc	0.5881	G	A	0.3078	1.047	0.959	1.142		0.3957	0.9691	0.9013	1.042		G	0.3252	0.3699	A	0.003029	0.8209		G	0.3492	0.3367	A	0.4134	1.057		G	0.3502	0.3422	A	0.6769	1.036		G	0.3521	0.3456	A	0.7236	1.029
rs13291498	9	28326185	1	WGAtop2000_noWTCCCassoc	0.5169	C	A	0.5132	0.9683	0.8793	1.066		0.2646	1.046	0.9665	1.132		C	0.2844	0.2444	A	0.003732	1.229		C	0.2535	0.2479	A	0.6895	1.03		C	0.2167	0.2289	A	0.4727	0.9321		C	0.2636	0.2767	A	0.4532	0.936
rs913836	9	34654672	2	WGArepli_ImmuneGenes	0.5239	G	A	0.3325	1.048	0.9533	1.152		0.04547	1.083	1.002	1.171		G	0.2847	0.2563	A	0.04178	1.155		G	0.2569	0.2432	A	0.327	1.076		G	0.277	0.2781	A	0.9518	0.9945		G	0.2729	0.2572	A	0.3625	1.084
rs2297132	9	34713181	2	WGArepli_ImmuneGenes	1	G	A	0.3066	0.9575	0.881	1.041		0.02911	0.926	0.8641	0.9922		G	0.4643	0.5021	A	0.0169	0.8595		G	0.4876	0.4982	A	0.5104	0.9582		G	0.4752	0.4891	A	0.4937	0.9459		G	0.4689	0.4761	A	0.7118	0.9715
rs10758270	9	34720754	2	WGArepli_ImmuneGenes	0.97	G	A	0.1316	0.9352	0.8571	1.02		0.007097	0.9054	0.8423	0.9733		G	0.3297	0.3685	A	0.01011	0.8429		G	0.3444	0.3618	A	0.2606	0.9264		G	0.3397	0.3578	A	0.3512	0.9235		G	0.3606	0.3687	A	0.6666	0.9656
rs10972619	9	35898488	1	WGAtop2000_noWTCCCassoc	0.8784	G	A	0.01786	0.882	0.7949	0.9786		0.7079	0.984	0.9044	1.071		G	0.2487	0.2106	A	0.003763	1.241		G	0.2037	0.2235	A	0.1377	0.8887		G	0.1923	0.2266	A	0.04265	0.8128		G	0.1849	0.2004	A	0.3175	0.905
rs7852943	9	73226703	1	WGAtop2000_noWTCCCassoc	0.1686	G	A	0.2782	1.052	0.9597	1.153		0.01386	1.099	1.019	1.186		G	0.3303	0.2882	A	0.003631	1.218		G	0.2956	0.2815	A	0.3351	1.071		G	0.3108	0.2687	A	0.02127	1.227		G	0.2597	0.2872	A	0.1161	0.8707
rs12005290	9	81895061	1	WGAtop2000_noWTCCCassoc	0.4178	A	G	0.7246	1.026	0.8908	1.181		0.04979	1.122	1	1.259		A	0.1183	0.09001	G	0.002835	1.356		A	0.1077	0.1016	G	0.5325	1.068		A	0.1038	0.09531	G	0.4802	1.1		A	0.07685	0.08444	G	0.478	0.9026
rs4357392	9	90075322	1	WGAtop2000_noWTCCCassoc	0.5646	A	G	0.2697	0.9235	0.8018	1.064		0.4261	1.048	0.934	1.176		A	0.117	0.08896	G	0.002922	1.357		A	0.1024	0.102	G	0.9718	1.004		A	0.07788	0.09323	G	0.183	0.8214		A	0.09339	0.1045	G	0.346	0.883
rs3132117	9	106873557	1	WGAtop2000_noWTCCCassoc	0.3113	G	A	0.9682	1.002	0.9187	1.092		0.09385	1.063	0.9897	1.142		G	0.3895	0.3456	A	0.003813	1.208		G	0.3729	0.3628	A	0.5172	1.044		G	0.3596	0.3692	A	0.6232	0.9592		G	0.362	0.3679	A	0.7563	0.975
rs1147338	9	131245070	1	WGAtop2000_noWTCCCassoc	0.895	C	A	0.07481	0.8988	0.7992	1.011		0.001968	0.8575	0.7779	0.9452		C	0.135	0.1682	A	0.003724	0.7716		C	0.1285	0.1549	A	0.02082	0.8043		C	0.1577	0.1589	A	0.9357	0.9911		C	0.1508	0.155	A	0.7645	0.9679
rs393543	9	134573818	1	WGAtop2000_noWTCCCassoc	0.279	A	G	0.9625	0.9966	0.8659	1.147		0.09324	0.9036	0.8027	1.017		A	0.07648	0.1037	G	0.003077	0.7155		A	0.08909	0.09778	G	0.3596	0.9024		A	0.1025	0.1021	G	0.9744	1.004		A	0.1041	0.09298	G	0.3376	1.133
rs4841875	9	137495191	1	WGAtop2000_noWTCCCassoc	0.6765	G	A	0.6139	1.022	0.9401	1.11		0.2101	0.9569	0.8931	1.025		A	0.5258	0.4793	G	0.003196	1.205		G	0.5028	0.4968	A	0.7117	1.024		A	0.4966	0.4854	G	0.5807	1.046		G	0.4815	0.4622	A	0.3227	1.081
rs12258526	10	5423973	3	WGAtop3000associatedWTCCC	1	A	C	0.3634	1.125	0.8731	1.449		0.01712	1.282	1.045	1.573		A	0.0392	0.02393	C	0.004094	1.665		A	0.0297	0.02933	C	0.9463	1.013		A	0.0214	0.02346	C	0.7332	0.91		A	0.03405	0.02169	C	0.04783	1.59
rs8177583	10	6068059	2	WGArepli_ImmuneGenes	0.7131	A	G	0.7759	1.018	0.9018	1.149		0.3165	0.9498	0.8588	1.051		A	0.1228	0.1473	G	0.0241	0.8098		A	0.134	0.1409	G	0.5351	0.9432		A	0.1554	0.1464	G	0.5313	1.073		A	0.1274	0.1189	G	0.5043	1.082
rs1323651	10	6073307	2	WGArepli_ImmuneGenes	0.3431	A	C	0.2426	1.052	0.9662	1.146		0.02831	1.082	1.008	1.161		A	0.4299	0.394	C	0.02074	1.16		A	0.4006	0.3991	C	0.9291	1.006		A	0.4493	0.4318	C	0.3832	1.074		A	0.357	0.3409	C	0.3879	1.073
rs10904701	10	6742604	1	WGAtop2000_noWTCCCassoc	0.1236	G	A	0.4282	0.9641	0.8808	1.055		0.0221	0.9158	0.8493	0.9875		G	0.2712	0.3129	A	0.003816	0.817		G	0.2804	0.3064	A	0.07921	0.8821		G	0.3176	0.3128	A	0.8013	1.022		G	0.3161	0.3117	A	0.8048	1.021
rs7895109	10	8082402	3	WGAtop3000associatedWTCCC	0.05974	A	G	0.9235	1.007	0.8786	1.153		0.169	0.9225	0.8222	1.035		A	0.08098	0.1069	G	0.005646	0.7362		A	0.09903	0.1027	G	0.7061	0.9601		A	0.1036	0.1063	G	0.8318	0.9722		A	0.1138	0.1028	G	0.3607	1.121
rs7921734	10	8668422	1	WGAtop2000_noWTCCCassoc	0.4339	G	A	0.4647	0.9561	0.8477	1.078		0.02547	0.8913	0.8057	0.986		G	0.115	0.1473	A	0.002807	0.7523		G	0.134	0.1388	A	0.667	0.9601		G	0.1419	0.1495	A	0.5976	0.9408		G	0.1381	0.1406	A	0.8581	0.98
rs12778087	10	34545870	1	WGAtop2000_noWTCCCassoc	0.76	G	A	0.02535	1.119	1.014	1.235		0.0005023	1.156	1.065	1.254		G	0.2494	0.2103	A	0.002949	1.248		G	0.2327	0.2124	A	0.13	1.124		G	0.2185	0.2109	A	0.6506	1.046		G	0.2675	0.235	A	0.05377	1.189
rs1198114	10	54886639	1	WGAtop2000_noWTCCCassoc	0.7014	G	A	0.6108	1.022	0.9402	1.111		0.2383	0.9593	0.8952	1.028		G	0.428	0.4747	A	0.002977	0.8281		G	0.4703	0.4678	A	0.8763	1.01		G	0.509	0.4948	A	0.4835	1.059		G	0.466	0.4622	A	0.8482	1.015
rs11004434	10	56083410	1	WGAtop2000_noWTCCCassoc	0.4409	A	G	0.8169	1.014	0.9014	1.141		0.18	0.9347	0.8468	1.032		A	0.1208	0.1532	G	0.003276	0.7598		A	0.157	0.1474	G	0.4058	1.078		A	0.1284	0.1417	G	0.3416	0.8924		A	0.1527	0.1456	G	0.6058	1.058
rs10443943	10	71931525	1	WGAtop2000_noWTCCCassoc	0.4638	A	G	0.7186	1.029	0.882	1.2		0.1838	0.9168	0.8064	1.042		A	0.06765	0.09324	G	0.003505	0.7056		A	0.07703	0.07734	G	0.9718	0.9957		A	0.05656	0.04927	G	0.4176	1.157		A	0.11	0.1079	G	0.865	1.022
rs2395423	10	78127996	1	WGAtop2000_noWTCCCassoc	0.6575	A	G	0.9855	0.9988	0.8746	1.141		0.1021	1.095	0.982	1.222		A	0.1269	0.09774	G	0.002907	1.342		A	0.1112	0.1109	G	0.9753	1.003		A	0.116	0.1068	G	0.4672	1.098		A	0.1031	0.1135	G	0.3972	0.8983
rs9325599	10	89883594	1	WGAtop2000_noWTCCCassoc	0.8114	A	G	0.9672	1.002	0.909	1.105		0.1033	1.069	0.9865	1.159		A	0.261	0.2216	G	0.00331	1.24		A	0.2493	0.2328	G	0.2324	1.094		A	0.2151	0.2365	G	0.2107	0.8849		A	0.2471	0.2517	G	0.7865	0.9758
rs10736277	10	121705898	3	WGAtop3000associatedWTCCC	0.1047	A	G	0.1332	0.9079	0.8003	1.03		0.004615	0.859	0.7731	0.9544		A	0.1093	0.1385	G	0.00547	0.7627		A	0.116	0.1223	G	0.5498	0.9418		A	0.116	0.1182	G	0.864	0.9786		A	0.1313	0.1556	G	0.07982	0.8207
rs2919009	10	122581363	1	WGAtop2000_noWTCCCassoc	0.9576	A	G	0.2365	1.063	0.9605	1.177		0.5039	0.9716	0.8927	1.057		A	0.1902	0.2286	G	0.003095	0.7929		A	0.2189	0.1981	G	0.112	1.134		A	0.2061	0.1984	G	0.6383	1.049		A	0.2218	0.2244	G	0.8705	0.9848
rs10510142	10	126811460	1	WGAtop2000_noWTCCCassoc	0.918	G	A	0.1609	1.074	0.9719	1.187		0.005007	1.125	1.036	1.222		G	0.25	0.2117	A	0.003618	1.241		G	0.2181	0.221	A	0.8298	0.9833		G	0.2325	0.2097	A	0.1738	1.142		G	0.2378	0.2135	A	0.135	1.15
rs7907300	10	127646057	1	WGAtop2000_noWTCCCassoc	0.7628	G	A	0.4748	1.032	0.9465	1.125		0.03133	1.082	1.007	1.162		G	0.3965	0.3513	A	0.002904	1.214		G	0.3624	0.3716	A	0.555	0.9611		G	0.373	0.3441	A	0.1393	1.134		G	0.3735	0.3668	A	0.7222	1.029
rs4750892	10	129242856	1	WGAtop2000_noWTCCCassoc	0.9406	C	A	0.2097	0.9237	0.8159	1.046		0.006464	0.867	0.7823	0.9609		C	0.1205	0.1525	A	0.003624	0.7615		C	0.1314	0.1395	A	0.4674	0.9332		C	0.1273	0.1286	A	0.9182	0.9876		C	0.1158	0.1356	A	0.13	0.8348
rs3782115	11	213272	1	WGAtop2000_noWTCCCassoc	0.9328	A	G	0.4856	1.033	0.9428	1.132		0.03263	1.086	1.007	1.171		A	0.3192	0.2774	G	0.003611	1.221		A	0.2856	0.279	G	0.6482	1.033		A	0.3007	0.2979	G	0.8819	1.013		A	0.3021	0.2953	G	0.7032	1.033
rs276907	11	3713262	1	WGAtop2000_noWTCCCassoc	0.3747	G	A	0.4855	1.034	0.9416	1.135		0.2847	0.9584	0.8866	1.036		G	0.2423	0.2836	A	0.003133	0.8077		G	0.2907	0.2779	A	0.3779	1.065		G	0.268	0.2602	A	0.6603	1.041		G	0.2578	0.2631	A	0.757	0.9728
rs4910387	11	11555411	3	WGAtop3000associatedWTCCC	0.9401	A	G	0.06094	0.887	0.7824	1.006		0.9614	0.9975	0.9003	1.105		A	0.1477	0.12	G	0.008907	1.272		A	0.114	0.1357	G	0.04418	0.8188		A	0.1182	0.1272	G	0.503	0.92		A	0.1372	0.1406	G	0.8019	0.972
rs1370465	11	16350644	1	WGAtop2000_noWTCCCassoc	0.941	A	G	0.06232	1.085	0.9958	1.181		0.001313	1.123	1.046	1.205		A	0.4214	0.3758	G	0.003098	1.21		A	0.4006	0.3816	G	0.2301	1.083		A	0.3953	0.3786	G	0.3996	1.073		A	0.3872	0.3661	G	0.2658	1.094
rs1442930	11	27189991	3	WGAtop3000associatedWTCCC	0.8886	G	A	0.3088	1.044	0.9607	1.135		0.482	0.9755	0.9104	1.045		G	0.4383	0.4814	A	0.006213	0.8408		G	0.4675	0.466	A	0.9239	1.006		G	0.4741	0.4567	A	0.3895	1.073		G	0.4708	0.4544	A	0.4013	1.068
rs1912765	11	29462943	1	WGAtop2000_noWTCCCassoc	1	G	A	0.4263	1.04	0.9442	1.146		0.02139	1.098	1.014	1.189		G	0.2757	0.2359	A	0.003582	1.233		G	0.2724	0.2437	A	0.0427	1.162		G	0.2545	0.2593	A	0.7917	0.9756		G	0.2167	0.2325	A	0.3344	0.9128
rs3824982	11	30556321	3	WGAtop3000associatedWTCCC	0.8102	A	G	0.4975	1.034	0.9382	1.14		0.2777	0.956	0.8814	1.037		A	0.2134	0.2525	G	0.00363	0.8031		A	0.241	0.2275	G	0.3214	1.079		A	0.2511	0.2703	G	0.2836	0.9052		A	0.2335	0.2139	G	0.2275	1.119
rs2045528	11	30558886	3	WGAtop3000associatedWTCCC	0.4445	A	G	0.9171	0.9955	0.9141	1.084		0.1232	0.946	0.8815	1.015		A	0.3792	0.4197	G	0.008946	0.8446		A	0.3985	0.3999	G	0.9308	0.9943		A	0.3908	0.4219	G	0.1194	0.879		A	0.3813	0.3489	G	0.08404	1.15
rs1903605	11	37668746	3	WGAtop3000associatedWTCCC	0.8581	A	G	0.1716	0.9085	0.7915	1.043		0.006036	0.8509	0.7582	0.955		A	0.08612	0.1129	G	0.005334	0.7407		A	0.09613	0.1144	G	0.06862	0.8229		A	0.1151	0.1109	G	0.744	1.043		A	0.0856	0.09556	G	0.3783	0.8861
rs835784	11	44820394	1	WGAtop2000_noWTCCCassoc	0.6512	A	G	0.1265	1.067	0.9818	1.16		0.00364	1.108	1.034	1.187		A	0.5244	0.4775	G	0.002915	1.207		A	0.5062	0.4943	G	0.4606	1.049		A	0.5068	0.474	G	0.1061	1.14		G	0.4786	0.4861	A	0.7006	0.9704
rs569977	11	95566440	1	WGAtop2000_noWTCCCassoc	0.4198	A	C	0.545	0.9566	0.8288	1.104		0.2689	1.069	0.95	1.202		A	0.108	0.08122	C	0.003139	1.369		A	0.08506	0.09227	C	0.4361	0.9146		A	0.09122	0.09844	C	0.5461	0.9193		A	0.1021	0.09611	C	0.6045	1.07
rs2852371	11	105913422	1	WGAtop2000_noWTCCCassoc	0.3179	G	A	0.9814	0.999	0.9182	1.087		0.09894	1.06	0.989	1.137		G	0.4479	0.4015	A	0.002852	1.209		G	0.4102	0.4059	A	0.7877	1.018		G	0.4595	0.4479	A	0.5676	1.048		G	0.3988	0.4161	A	0.3688	0.9309
rs1046872	11	110684600	1	WGAtop2000_noWTCCCassoc	0.05207	G	A	0.09682	1.076	0.9869	1.173		0.002083	1.119	1.042	1.202		G	0.3927	0.3477	A	0.00306	1.213		G	0.3824	0.3586	A	0.1273	1.108		G	0.3514	0.3224	A	0.1296	1.138		G	0.3804	0.3806	A	0.9914	0.9991
rs478941	11	111409205	2	WGArepli_ImmuneGenes	0.3412	G	A	0.7837	1.012	0.9293	1.102		0.107	1.06	0.9875	1.138		G	0.3985	0.3625	A	0.01857	1.165		G	0.3809	0.3866	A	0.7159	0.976		G	0.4032	0.375	A	0.1537	1.126		G	0.3959	0.4011	A	0.7861	0.9786
rs360726	11	111494802	2	WGArepli_ImmuneGenes	0.4794	A	G	0.5604	1.031	0.9298	1.144		0.08647	1.077	0.9894	1.173		A	0.2281	0.1997	G	0.02679	1.184		A	0.1989	0.2035	G	0.7228	0.9717		A	0.1993	0.2057	G	0.6952	0.9611		A	0.214	0.188	G	0.09458	1.176
rs2177745	11	111745314	2	WGArepli_ImmuneGenes	0.7588	A	G	0.7184	1.027	0.8904	1.183		0.3707	0.9476	0.8422	1.066		A	0.0874	0.1065	G	0.04287	0.8032		A	0.08978	0.08655	G	0.7245	1.041		A	0.08896	0.101	G	0.3151	0.8688		A	0.1041	0.09611	G	0.4946	1.093
rs7127817	11	112131896	1	WGAtop2000_noWTCCCassoc	0.01037	A	G	0.003034	0.8659	0.7872	0.9524		0.3754	0.965	0.8919	1.044		A	0.2719	0.2324	G	0.003706	1.233		A	0.2493	0.2843	G	0.0151	0.8359		A	0.2759	0.2927	G	0.3601	0.9207		A	0.2251	0.2492	G	0.1508	0.8756
rs12541	11	124128702	1	WGAtop2000_noWTCCCassoc	0.1387	G	A	0.6635	0.9778	0.8839	1.082		0.04876	0.9191	0.8451	0.9996		G	0.1979	0.2359	A	0.00377	0.7992		G	0.2134	0.2103	A	0.8147	1.019		G	0.2151	0.2124	A	0.8725	1.016		G	0.2183	0.238	A	0.2317	0.894
rs7124686	11	124155694	1	WGAtop2000_noWTCCCassoc	0.3568	A	G	0.5692	1.031	0.9272	1.147		0.2687	0.9512	0.8706	1.039		A	0.1684	0.2043	G	0.003808	0.7886		A	0.1847	0.1792	G	0.6575	1.038		A	0.1979	0.188	G	0.5364	1.066		A	0.192	0.1932	G	0.9381	0.9923
rs797178	12	10786354	1	WGAtop2000_noWTCCCassoc	0.1391	G	A	0.5709	1.04	0.909	1.189		0.03739	1.124	1.007	1.254		G	0.1292	0.09986	A	0.002989	1.337		G	0.1137	0.1116	A	0.8342	1.022		G	0.1182	0.1011	A	0.1722	1.192		G	0.09357	0.1012	A	0.5113	0.9166
rs10743601	12	27300343	1	WGAtop2000_noWTCCCassoc	0.7723	G	A	0.0643	1.105	0.9942	1.227		0.001127	1.155	1.059	1.26		G	0.2147	0.1776	A	0.002754	1.266		G	0.1867	0.1799	A	0.5853	1.047		G	0.1836	0.176	A	0.6285	1.052		G	0.2325	0.1963	A	0.02305	1.24
rs10842897	12	27335219	1	WGAtop2000_noWTCCCassoc	0.7179	A	G	0.3472	0.96	0.8817	1.045		0.01211	0.9138	0.8517	0.9805		A	0.3875	0.4332	G	0.003316	0.8279		A	0.3971	0.4195	G	0.1593	0.9113		A	0.3818	0.39	G	0.6771	0.9659		A	0.3988	0.3935	G	0.7818	1.022
rs39635	12	28017512	1	WGAtop2000_noWTCCCassoc	0.3828	A	C	0.0298	1.1	1.009	1.199		0.0005103	1.135	1.057	1.219		A	0.4022	0.3565	C	0.002765	1.214		A	0.3624	0.3451	C	0.2647	1.078		A	0.4144	0.369	C	0.0214	1.21		A	0.3704	0.3606	C	0.6021	1.043
rs7960176	12	40915817	3	WGAtop3000associatedWTCCC	0.9099	A	G	0.8056	0.9892	0.9069	1.079		0.1603	1.053	0.9799	1.131		A	0.3843	0.3428	G	0.006041	1.197		A	0.3702	0.369	G	0.9399	1.005		A	0.3581	0.3651	G	0.72	0.9701		A	0.3385	0.3402	G	0.9278	0.9925
rs757344	12	46492363	1	WGAtop2000_noWTCCCassoc	0.07437	G	A	0.61	0.9785	0.9	1.064		0.03191	0.9268	0.8647	0.9935		G	0.4049	0.4511	A	0.003094	0.8278		G	0.4441	0.4417	A	0.8834	1.01		G	0.4392	0.4474	A	0.6841	0.9673		G	0.4757	0.4972	A	0.2703	0.9174
rs7953867	12	49767482	1	WGAtop2000_noWTCCCassoc	0.01167	A	G	0.4317	0.966	0.8862	1.053		0.02455	0.921	0.8572	0.9895		A	0.3303	0.3741	G	0.003787	0.8252		A	0.3798	0.3777	G	0.891	1.009		A	0.3727	0.4047	G	0.1073	0.8742		A	0.3444	0.3456	G	0.9486	0.9947
rs705708	12	54775180	2	WGArepli_ImmuneGenes	0.185	A	G	0.7563	1.013	0.9322	1.101		0.109	1.058	0.9875	1.134		A	0.5109	0.4726	G	0.01496	1.166		A	0.4724	0.4585	G	0.3905	1.057		G	0.4921	0.4891	A	0.8803	1.012		A	0.4396	0.4494	G	0.6116	0.9608
rs11171747	12	54804675	3	WGAtop3000associatedWTCCC	0.00971	C	A	0.5814	0.9761	0.8957	1.064		0.03343	0.9255	0.8617	0.9939		C	0.3456	0.3908	A	0.003082	0.8232		C	0.3838	0.3873	A	0.8273	0.9856		C	0.3423	0.351	A	0.6528	0.9623		C	0.394	0.3983	A	0.8195	0.9819
rs10783780	12	54990419	2	WGArepli_ImmuneGenes	0.684	G	A	0.1412	1.155	0.9529	1.401		0.01285	1.219	1.043	1.425		G	0.06234	0.04712	A	0.03042	1.345		G	0.04903	0.04113	A	0.2331	1.202		G	0.06869	0.05469	A	0.1434	1.275		G	0.03988	0.04111	A	0.8737	0.9689
rs349885	12	60601188	1	WGAtop2000_noWTCCCassoc	0.3104	G	A	0.07763	0.891	0.7837	1.013		0.9098	1.006	0.9055	1.118		G	0.1362	0.1066	A	0.003475	1.322		G	0.1107	0.1295	A	0.07694	0.8365		G	0.1081	0.1141	A	0.642	0.9415		G	0.1284	0.1372	A	0.5079	0.9263
rs764065	12	72263830	3	WGAtop3000associatedWTCCC	0.5505	A	G	0.01105	0.8639	0.7717	0.9671		0.5551	0.9728	0.8875	1.066		A	0.1985	0.1657	G	0.00663	1.246		A	0.1623	0.181	G	0.1286	0.8768		A	0.1667	0.1911	G	0.1191	0.8463		A	0.1323	0.155	G	0.1007	0.8312
rs2279575	12	75941475	1	WGAtop2000_noWTCCCassoc	0.193	A	G	0.7164	1.016	0.9341	1.104		0.1842	0.954	0.89	1.023		A	0.4179	0.4637	G	0.003575	0.8303		A	0.4281	0.4345	G	0.6867	0.974		A	0.4673	0.4505	G	0.4053	1.07		A	0.4591	0.4567	G	0.8988	1.01
rs17284624	12	85031877	1	WGAtop2000_noWTCCCassoc	0.79	A	G	0.9364	1.005	0.8805	1.148		0.1239	0.916	0.8191	1.024		A	0.08816	0.1164	G	0.003712	0.734		A	0.1196	0.1109	G	0.3941	1.09		A	0.1182	0.124	G	0.6672	0.9477		A	0.09241	0.09611	G	0.7467	0.9576
rs3812796	12	103519589	3	WGAtop3000associatedWTCCC	0.3842	A	G	0.9831	0.9988	0.8938	1.116		0.1035	1.079	0.9846	1.182		A	0.1898	0.1548	G	0.00293	1.279		A	0.166	0.1696	G	0.7618	0.974		A	0.1772	0.1651	G	0.4267	1.089		A	0.1644	0.1717	G	0.6198	0.9493
rs3825251	12	107812113	1	WGAtop2000_noWTCCCassoc	0.731	G	A	0.5523	0.9648	0.8572	1.086		0.2424	1.059	0.962	1.166		G	0.178	0.1442	A	0.003096	1.286		G	0.1533	0.151	A	0.8446	1.018		G	0.1185	0.1557	A	0.009045	0.7289		G	0.1537	0.1367	A	0.2132	1.147
rs11066320	12	111390798	3	WGAtop3000associatedWTCCC	0.3924	A	G	0.01036	1.116	1.026	1.214		0.000327	1.136	1.06	1.218		A	0.4645	0.4233	G	0.008502	1.182		A	0.4454	0.4185	G	0.09203	1.116		A	0.4402	0.4193	G	0.2978	1.089		A	0.4639	0.4333	G	0.1154	1.132
rs2279051	12	112840357	1	WGAtop2000_noWTCCCassoc	0.4008	A	G	0.7819	1.017	0.9035	1.144		0.1707	0.9328	0.8444	1.03		A	0.1165	0.1492	G	0.002809	0.7525		A	0.143	0.147	G	0.7235	0.9679		A	0.1734	0.1599	G	0.3682	1.102		A	0.1274	0.1244	G	0.8176	1.028
rs2720034	12	120651478	1	WGAtop2000_noWTCCCassoc	0.2345	A	G	0.4069	1.048	0.9382	1.171		0.3488	0.9567	0.8721	1.05		A	0.1454	0.1796	G	0.003756	0.7775		A	0.1685	0.1675	G	0.9337	1.007		A	0.1869	0.175	G	0.4427	1.084		A	0.1634	0.1556	G	0.5815	1.06
rs11060591	12	128914686	1	WGAtop2000_noWTCCCassoc	0.3379	A	C	0.06418	1.103	0.9942	1.224		0.001061	1.155	1.059	1.259		A	0.2089	0.1725	C	0.003034	1.266		A	0.1874	0.1843	C	0.8061	1.021		A	0.232	0.1917	C	0.01376	1.274		A	0.2125	0.2	C	0.4291	1.079
rs9315905	13	20302969	1	WGAtop2000_noWTCCCassoc	0.007374	A	G	0.8312	1.012	0.9076	1.128		0.1743	0.9393	0.8582	1.028		A	0.1607	0.1962	G	0.003608	0.7842		A	0.178	0.1704	G	0.5346	1.054		A	0.1986	0.199	G	0.9846	0.998		A	0.1657	0.1685	G	0.8465	0.9799
rs1535640	13	26955086	1	WGAtop2000_noWTCCCassoc	0.5458	A	G	0.7248	0.985	0.9054	1.072		0.1816	1.049	0.9781	1.124		A	0.4707	0.4247	G	0.003444	1.205		A	0.4171	0.4217	G	0.776	0.9815		A	0.4255	0.4213	G	0.8328	1.018		A	0.4232	0.4366	G	0.4876	0.9466
rs9568668	13	32420655	3	WGAtop3000associatedWTCCC	0.295	G	A	0.5005	1.07	0.8782	1.305		0.02842	1.198	1.019	1.408		G	0.05784	0.03938	A	0.005155	1.498		G	0.04696	0.05114	A	0.5522	0.9142		G	0.04279	0.03906	A	0.64	1.1		G	0.05156	0.03944	A	0.1302	1.324
rs9533935	13	44112063	3	WGAtop3000associatedWTCCC	0.2996	C	A	0.005937	1.125	1.034	1.224		9.132e-005	1.149	1.072	1.232		C	0.4557	0.4116	A	0.004766	1.197		C	0.4468	0.4235	A	0.1452	1.1		C	0.4527	0.4177	A	0.08145	1.153		C	0.4368	0.4038	A	0.08694	1.145
rs4628860	13	50790509	1	WGAtop2000_noWTCCCassoc	1	C	A	0.7933	0.9851	0.8806	1.102		0.1707	1.067	0.9726	1.17		C	0.1851	0.1511	A	0.003493	1.276		C	0.1592	0.1619	A	0.8247	0.9806		C	0.1749	0.2006	A	0.1089	0.8448		C	0.1608	0.1423	A	0.1846	1.155
rs9535645	13	50805219	1	WGAtop2000_noWTCCCassoc	0.331	C	A	0.8762	0.9918	0.8938	1.101		0.1293	1.068	0.9808	1.164		C	0.2262	0.1888	A	0.003135	1.256		C	0.1961	0.2015	A	0.6782	0.9668		C	0.2083	0.2278	A	0.2472	0.8918		C	0.194	0.1737	A	0.1793	1.145
rs9569320	13	55044198	1	WGAtop2000_noWTCCCassoc	0.7432	G	A	0.7657	1.015	0.9215	1.117		0.06092	1.079	0.9965	1.168		G	0.2751	0.2349	A	0.003213	1.236		G	0.2396	0.243	A	0.8074	0.9817		G	0.2782	0.2344	A	0.01252	1.259		G	0.2354	0.26	A	0.1469	0.8763
rs10507820	13	73441787	3	WGAtop3000associatedWTCCC	0.3317	A	G	0.352	0.9589	0.8777	1.048		0.4737	1.027	0.9548	1.105		A	0.3657	0.3249	G	0.006297	1.198		A	0.3262	0.3444	G	0.2341	0.9214		A	0.3423	0.3474	G	0.7935	0.9779		A	0.3161	0.3161	G	0.9959	1
rs10507828	13	74112529	1	WGAtop2000_noWTCCCassoc	0.8617	A	G	0.4009	1.04	0.9485	1.141		0.3579	0.9645	0.8929	1.042		A	0.2481	0.2901	G	0.002853	0.8074		A	0.2721	0.2695	G	0.8569	1.013		A	0.2894	0.2693	G	0.2666	1.105		A	0.3035	0.2909	G	0.4792	1.062
rs9544492	13	76890757	3	WGAtop3000associatedWTCCC	0.9386	G	A	0.9753	1.001	0.9175	1.093		0.1402	1.056	0.9822	1.135		G	0.3668	0.3263	A	0.006755	1.196		G	0.3446	0.3348	A	0.5202	1.045		G	0.3435	0.351	A	0.6954	0.9671		G	0.3434	0.3517	A	0.6567	0.9641
rs985035	13	83160898	1	WGAtop2000_noWTCCCassoc	0.1709	G	A	0.9945	0.9997	0.9194	1.087		0.0805	1.064	0.9925	1.14		G	0.4839	0.4378	A	0.003274	1.204		G	0.4765	0.4732	A	0.8378	1.013		G	0.4043	0.4094	A	0.7983	0.9791		G	0.4621	0.4611	A	0.9593	1.004
rs2685785	13	86406679	1	WGAtop2000_noWTCCCassoc	0.1775	G	A	0.563	0.9719	0.8825	1.07		0.03909	0.9187	0.8476	0.9958		G	0.2156	0.2556	A	0.00301	0.8003		G	0.2424	0.235	A	0.59	1.042		G	0.2601	0.2516	A	0.6276	1.046		G	0.2335	0.2711	A	0.02762	0.8188
rs3742133	13	97955530	1	WGAtop2000_noWTCCCassoc	0.6952	A	G	0.4462	0.9243	0.7549	1.132		0.3363	1.083	0.9205	1.275		A	0.06041	0.04079	G	0.00351	1.512		A	0.0511	0.06044	G	0.2144	0.8372		A	0.03266	0.03542	G	0.7097	0.9195		A	0.04183	0.03778	G	0.5936	1.112
rs2050452	13	100964561	1	WGAtop2000_noWTCCCassoc	0.2989	G	A	0.4142	0.958	0.8642	1.062		0.0214	0.9044	0.8302	0.9853		G	0.1884	0.2264	A	0.003242	0.7929		G	0.1939	0.2175	A	0.07371	0.8651		G	0.2182	0.2226	A	0.7953	0.9748		G	0.2098	0.1944	A	0.3267	1.1
rs884708	13	110813104	1	WGAtop2000_noWTCCCassoc	0.0568	G	A	0.4995	0.9715	0.8933	1.057		0.3167	1.036	0.9666	1.111		G	0.4717	0.4262	A	0.003622	1.202		G	0.4343	0.4546	A	0.2081	0.9212		G	0.4347	0.438	A	0.8684	0.9865		G	0.4212	0.4221	A	0.9616	0.9962
rs2222924	14	21505442	1	WGAtop2000_noWTCCCassoc	0.08078	G	A	0.761	1.015	0.9216	1.118		0.1685	0.945	0.8719	1.024		G	0.2172	0.2567	A	0.003515	0.8036		G	0.2497	0.2353	A	0.3008	1.081		G	0.2297	0.2375	A	0.6516	0.9575		G	0.2558	0.2633	A	0.6622	0.9617
rs1892555	14	27097765	1	WGAtop2000_noWTCCCassoc	0.4187	G	A	0.1105	1.119	0.9746	1.285		0.7524	0.9813	0.8726	1.104		G	0.07429	0.1011	A	0.003242	0.7133		G	0.1015	0.09371	A	0.4134	1.093		G	0.1205	0.1057	A	0.2456	1.159		G	0.09339	0.08556	A	0.4805	1.101
rs7151191	14	36662132	1	WGAtop2000_noWTCCCassoc	0.6327	A	G	0.4551	0.965	0.8789	1.06		0.02806	0.9165	0.8479	0.9907		A	0.2461	0.2869	G	0.00368	0.8115		A	0.2683	0.2829	G	0.3151	0.9296		A	0.2827	0.2953	G	0.4925	0.9403		A	0.2646	0.2517	G	0.4489	1.07
rs2883414	14	61813365	1	WGAtop2000_noWTCCCassoc	0.8714	G	A	0.413	0.963	0.88	1.054		0.01358	0.91	0.8444	0.9808		G	0.286	0.3298	A	0.002754	0.8139		G	0.2925	0.324	A	0.03601	0.8626		G	0.3086	0.2984	A	0.5869	1.049		G	0.3103	0.3094	A	0.9618	1.004
rs4902914	14	70721840	1	WGAtop2000_noWTCCCassoc	0.5015	G	A	0.08423	0.9162	0.8296	1.012		0.001686	0.8756	0.8058	0.9513		G	0.1986	0.237	A	0.003456	0.7978		G	0.2313	0.2325	A	0.9317	0.9934		G	0.205	0.2304	A	0.1309	0.8609		G	0.2237	0.2536	A	0.0747	0.8482
rs2160672	14	86440465	3	WGAtop3000associatedWTCCC	0.6951	C	A	0.1701	1.202	0.9238	1.564		0.009231	1.333	1.073	1.657		C	0.03213	0.01935	A	0.007935	1.682		C	0.02831	0.02754	A	0.8842	1.029		C	0.03041	0.02344	A	0.2774	1.307		C	0.0214	0.01556	A	0.2566	1.384
rs7146876	14	94215722	3	WGAtop3000associatedWTCCC	0.3817	G	A	0.153	1.078	0.9725	1.194		0.004113	1.132	1.04	1.231		G	0.2352	0.1969	A	0.002936	1.254		G	0.2144	0.2028	A	0.3767	1.073		G	0.2027	0.1773	A	0.1068	1.18		G	0.2169	0.215	A	0.9047	1.011
rs2414223	15	51075679	1	WGAtop2000_noWTCCCassoc	0.08389	A	C	0.589	1.034	0.9157	1.168		0.2223	0.9393	0.8494	1.039		A	0.1248	0.1579	C	0.003035	0.7609		A	0.1457	0.1446	C	0.9216	1.009		A	0.1295	0.1313	C	0.8985	0.9847		A	0.1304	0.1194	C	0.3963	1.105
rs9989279	15	52792859	1	WGAtop2000_noWTCCCassoc	0.005684	A	G	0.6312	1.021	0.9387	1.11		0.04189	1.075	1.003	1.152		G	0.4537	0.5011	A	0.002671	0.8271		G	0.5042	0.4975	A	0.6797	1.027		A	0.4793	0.4842	G	0.8127	0.9808		A	0.4902	0.4612	G	0.1396	1.123
rs925481	15	68524205	1	WGAtop2000_noWTCCCassoc	1	C	A	0.9371	0.9956	0.8926	1.111		0.09223	0.9243	0.8434	1.013		C	0.1498	0.1845	A	0.00372	0.7789		C	0.1757	0.1735	A	0.8582	1.015		C	0.1851	0.2016	A	0.3076	0.8998		C	0.1693	0.1578	A	0.4253	1.088
rs4777408	15	69621046	3	WGAtop3000associatedWTCCC	0.0334	A	G	0.6672	1.021	0.9282	1.123		0.2919	0.958	0.8845	1.038		A	0.2198	0.2553	G	0.008679	0.8219		A	0.2666	0.2504	G	0.2501	1.089		A	0.259	0.2437	G	0.3843	1.084		A	0.2398	0.2617	G	0.1982	0.8899
rs94899	15	72345662	3	WGAtop3000associatedWTCCC	0.7372	G	A	0.01768	1.133	1.022	1.256		0.6024	1.023	0.939	1.115		G	0.1844	0.218	A	0.008523	0.8113		G	0.2134	0.1992	A	0.277	1.091		G	0.2106	0.2	A	0.5169	1.067		G	0.2101	0.1756	A	0.02369	1.249
rs11632698	15	72424920	1	WGAtop2000_noWTCCCassoc	0.4161	A	G	0.3743	1.04	0.9543	1.132		0.3663	0.9679	0.9016	1.039		A	0.3657	0.4107	G	0.003499	0.8272		A	0.388	0.3841	G	0.8072	1.016		A	0.384	0.3708	G	0.5025	1.058		A	0.3911	0.3792	G	0.5323	1.051
rs4887017	15	76291717	1	WGAtop2000_noWTCCCassoc	0.9357	A	G	0.1027	1.077	0.9852	1.177		0.00287	1.119	1.039	1.204		A	0.3368	0.294	G	0.003306	1.22		A	0.3377	0.3133	G	0.1066	1.118		A	0.3255	0.3089	G	0.3783	1.08		A	0.3181	0.3156	G	0.889	1.012
rs980618	15	79305264	2	WGArepli_ImmuneGenes	0.1334	A	G	0.5887	1.028	0.9307	1.135		0.1059	1.07	0.9858	1.161		A	0.2494	0.2222	G	0.04143	1.163		A	0.239	0.2303	G	0.5289	1.049		A	0.2297	0.2188	G	0.5152	1.065		A	0.2189	0.2206	G	0.9172	0.9902
rs10444986	16	9624870	3	WGAtop3000associatedWTCCC	0.5707	A	C	0.9484	1.003	0.9169	1.097		0.1328	1.059	0.9828	1.14		A	0.3293	0.291	C	0.008423	1.196		A	0.3059	0.3076	C	0.9124	0.9923		A	0.3119	0.3021	C	0.598	1.047		A	0.3288	0.3289	C	0.9959	0.9996
rs4780550	16	9636650	3	WGAtop3000associatedWTCCC	0.6307	A	G	0.9225	1.005	0.9114	1.108		0.09077	1.072	0.989	1.162		A	0.2584	0.2199	G	0.003963	1.236		A	0.2396	0.2318	G	0.5656	1.045		A	0.228	0.2359	G	0.645	0.9565		A	0.25	0.2486	G	0.9345	1.007
rs243324	16	11262471	3	WGAtop3000associatedWTCCC	0.8336	G	A	0.5525	0.975	0.8968	1.06		0.04825	0.9326	0.8701	0.9995		G	0.4306	0.4736	A	0.006158	0.8404		G	0.4613	0.4614	A	0.9977	0.9998		G	0.4347	0.4417	A	0.7289	0.972		G	0.4533	0.4628	A	0.6269	0.9626
rs1345879	16	11312263	1	WGAtop2000_noWTCCCassoc	0.8652	A	G	0.7784	1.013	0.9244	1.111		0.05984	1.075	0.997	1.16		A	0.3207	0.2778	G	0.002785	1.227		A	0.2822	0.2947	G	0.3934	0.9407		A	0.2765	0.2763	G	0.9915	1.001		A	0.3142	0.285	G	0.1016	1.149
rs8058023	16	13259770	1	WGAtop2000_noWTCCCassoc	0.9722	C	A	0.8623	1.007	0.9269	1.095		0.08227	1.063	0.9922	1.139		C	0.5096	0.4631	A	0.00312	1.205		C	0.4883	0.485	A	0.8393	1.013		C	0.4437	0.474	A	0.1348	0.8852		C	0.4805	0.4531	A	0.1599	1.116
rs10492781	16	13264188	1	WGAtop2000_noWTCCCassoc	1	A	G	0.5192	0.9668	0.8724	1.071		0.04263	0.9148	0.8392	0.9971		A	0.1722	0.2085	G	0.003737	0.7898		A	0.1934	0.201	G	0.5545	0.9529		A	0.2218	0.1974	G	0.1357	1.159		A	0.2043	0.2322	G	0.0855	0.8488
rs4781732	16	16170073	1	WGAtop2000_noWTCCCassoc	0.1002	A	G	0.6377	1.021	0.9373	1.112		0.191	0.9538	0.8885	1.024		A	0.3528	0.398	G	0.003174	0.8245		A	0.3878	0.3816	G	0.6942	1.027		A	0.3824	0.3951	G	0.5208	0.9478		A	0.4115	0.3972	G	0.4571	1.061
rs8052258	16	28212498	2	WGArepli_ImmuneGenes	0.3445	G	A	0.7156	0.9846	0.9057	1.07		0.2615	1.04	0.9709	1.115		G	0.482	0.4437	A	0.01486	1.166		G	0.4738	0.4517	A	0.1719	1.093		G	0.4345	0.4609	A	0.1916	0.8987		G	0.4514	0.4694	A	0.3536	0.9298
rs2650494	16	28225941	2	WGArepli_ImmuneGenes	0.2396	G	A	0.912	0.9953	0.9148	1.083		0.1163	1.057	0.9862	1.134		G	0.4505	0.4058	A	0.004056	1.201		G	0.4398	0.4166	A	0.1469	1.1		G	0.4084	0.4349	A	0.187	0.8969		G	0.4086	0.4206	A	0.5336	0.9518
rs2076756	16	49314382	3	WGAtop3000associatedWTCCC	0.03478	G	A	0.7624	1.015	0.9217	1.118		0.07247	1.075	0.9934	1.163		G	0.2934	0.253	A	0.00377	1.226		G	0.2486	0.2454	A	0.8148	1.018		G	0.2167	0.2219	A	0.7587	0.9702		G	0.2782	0.2711	A	0.6838	1.036
rs4784383	16	53027674	1	WGAtop2000_noWTCCCassoc	0.4594	A	G	0.6193	1.021	0.9394	1.111		0.2151	0.9571	0.8929	1.026		A	0.4152	0.4613	G	0.003226	0.8289		A	0.4406	0.4413	G	0.9634	0.997		A	0.4516	0.4464	G	0.7958	1.021		A	0.4533	0.4411	G	0.5302	1.051
rs8059875	16	77936137	1	WGAtop2000_noWTCCCassoc	0.8888	G	A	0.137	0.9385	0.8632	1.02		0.7151	1.013	0.9452	1.086		G	0.482	0.436	A	0.003379	1.204		G	0.4413	0.4624	A	0.1896	0.9181		G	0.4165	0.451	A	0.08646	0.8687		G	0.4874	0.4772	A	0.604	1.041
rs388192	16	82853444	1	WGAtop2000_noWTCCCassoc	0.7212	A	C	0.05629	0.9049	0.8167	1.003		0.9368	1.003	0.9224	1.092		A	0.2371	0.1994	C	0.003415	1.248		A	0.1968	0.2082	C	0.3854	0.9322		A	0.2099	0.2138	C	0.8176	0.9773		A	0.2023	0.2383	C	0.0275	0.8106
rs2051987	17	10120918	1	WGAtop2000_noWTCCCassoc	0.8512	A	G	0.526	1.028	0.9433	1.121		0.02566	1.085	1.01	1.165		A	0.3817	0.3372	G	0.003115	1.214		A	0.3598	0.3659	G	0.6966	0.9741		A	0.3781	0.3859	G	0.6916	0.9674		A	0.3765	0.3363	G	0.03145	1.191
rs2671689	17	44918120	1	WGAtop2000_noWTCCCassoc	0.02529	G	A	0.9748	1.002	0.8815	1.139		0.0899	1.096	0.9858	1.218		G	0.135	0.1054	A	0.003452	1.324		G	0.1319	0.117	A	0.1608	1.146		G	0.1196	0.1276	A	0.5533	0.9291		G	0.1041	0.115	A	0.3742	0.8941
rs9893354	17	47893566	1	WGAtop2000_noWTCCCassoc	0.5544	G	A	0.463	0.9693	0.8919	1.053		0.02363	0.9234	0.8619	0.9894		G	0.455	0.5007	A	0.003739	0.8326		G	0.4696	0.4993	A	0.06676	0.888		G	0.4797	0.4818	A	0.9198	0.9919		G	0.4912	0.475	A	0.4049	1.067
rs2019194	17	49792259	1	WGAtop2000_noWTCCCassoc	0.001545	A	G	0.074	0.8997	0.8012	1.01		0.945	1.003	0.9116	1.104		A	0.1645	0.1322	G	0.003476	1.293		A	0.1436	0.1592	G	0.1843	0.8862		A	0.158	0.1609	G	0.8443	0.9784		A	0.142	0.1639	G	0.1232	0.8445
rs2158970	17	65590481	1	WGAtop2000_noWTCCCassoc	0.727	A	G	0.9269	1.006	0.8936	1.131		0.0894	1.087	0.9872	1.198		A	0.169	0.1364	G	0.003598	1.288		A	0.1438	0.1409	G	0.7955	1.024		A	0.1543	0.1432	G	0.4416	1.091		A	0.1411	0.1539	G	0.3567	0.9029
rs2215060	17	66947872	3	WGAtop3000associatedWTCCC	0.9097	A	G	0.5368	1.028	0.9424	1.121		0.0494	1.074	1	1.154		A	0.4052	0.364	G	0.007194	1.19		A	0.3624	0.3693	G	0.659	0.9707		A	0.357	0.3344	G	0.2401	1.105		A	0.3716	0.365	G	0.7264	1.029
rs12950722	17	73318692	1	WGAtop2000_noWTCCCassoc	0.6361	A	G	0.942	0.9964	0.9042	1.098		0.07812	0.9297	0.8572	1.008		A	0.2102	0.2495	G	0.003303	0.8005		A	0.2469	0.2337	G	0.3398	1.075		A	0.2404	0.2357	G	0.7836	1.027		A	0.2364	0.2611	G	0.1452	0.876
rs17729319	17	74033232	1	WGAtop2000_noWTCCCassoc	0.7534	A	G	0.6009	1.03	0.9219	1.151		0.04575	1.098	1.002	1.203		A	0.1885	0.1543	G	0.003608	1.273		A	0.172	0.1681	G	0.7504	1.028		A	0.1554	0.1422	G	0.3568	1.11		A	0.1829	0.1867	G	0.8031	0.9752
rs3214047	18	735884	1	WGAtop2000_noWTCCCassoc	1	C	A	0.7639	1.021	0.8922	1.168		0.05533	1.115	0.9976	1.245		C	0.1228	0.09423	A	0.00309	1.345		C	0.1119	0.1081	A	0.7077	1.039		C	0.08108	0.09062	A	0.4055	0.8854		C	0.1274	0.1146	A	0.3102	1.129
rs894733	18	3317868	1	WGAtop2000_noWTCCCassoc	0.02037	G	A	0.01663	1.141	1.024	1.272		0.6939	1.018	0.9305	1.114		G	0.1587	0.1944	A	0.003328	0.7817		G	0.1982	0.1652	A	0.007563	1.249		G	0.1667	0.1427	A	0.09853	1.201		G	0.1955	0.1972	A	0.913	0.9893
rs11873891	18	6495597	1	WGAtop2000_noWTCCCassoc	0.9111	G	A	0.147	1.065	0.978	1.161		0.7079	0.9865	0.9189	1.059		G	0.3593	0.4047	A	0.003101	0.8247		G	0.3838	0.3727	A	0.4777	1.049		G	0.4009	0.3755	A	0.1984	1.113		G	0.3784	0.3667	A	0.5342	1.052
rs657555	18	12837136	3	WGAtop3000associatedWTCCC	0.3889	G	A	0.05159	1.114	0.9992	1.241		0.001364	1.158	1.058	1.266		G	0.1941	0.1614	A	0.006115	1.251		G	0.1768	0.1677	A	0.4574	1.066		G	0.2106	0.175	A	0.0243	1.258		G	0.1745	0.1661	A	0.569	1.061
rs10502595	18	28224574	1	WGAtop2000_noWTCCCassoc	0.4747	A	G	0.3219	1.073	0.9334	1.233		0.4606	0.957	0.8515	1.076		A	0.08044	0.1076	G	0.003785	0.7255		A	0.1017	0.09062	G	0.2437	1.136		A	0.09797	0.09635	G	0.8927	1.019		A	0.1031	0.1007	G	0.836	1.027
rs4129469	18	33788038	1	WGAtop2000_noWTCCCassoc	0.1541	A	G	0.8764	0.9924	0.9018	1.092		0.1224	1.064	0.9834	1.151		A	0.2841	0.2433	G	0.003136	1.234		A	0.2524	0.2471	G	0.7061	1.029		A	0.2646	0.262	G	0.8816	1.014		A	0.2412	0.2545	G	0.4352	0.9316
rs4799989	18	33796359	1	WGAtop2000_noWTCCCassoc	0.2064	A	C	0.7574	0.9843	0.8901	1.088		0.1556	1.062	0.9775	1.153		A	0.2526	0.2137	C	0.003337	1.243		A	0.2167	0.2213	C	0.7276	0.973		A	0.2207	0.2208	C	0.9975	0.9997		A	0.2217	0.2224	C	0.9643	0.9958
rs8084309	18	42005991	1	WGAtop2000_noWTCCCassoc	0.5098	G	A	0.8778	0.9927	0.9039	1.09		0.1311	1.062	0.9823	1.147		G	0.2876	0.2465	A	0.002969	1.234		G	0.279	0.2715	A	0.6013	1.039		G	0.2483	0.2578	A	0.5902	0.9508		G	0.2792	0.2829	A	0.8348	0.982
rs9947316	18	42031829	1	WGAtop2000_noWTCCCassoc	0.1068	A	C	0.3553	0.9613	0.8841	1.045		0.383	1.031	0.9623	1.105		A	0.4755	0.429	C	0.002973	1.207		A	0.4613	0.4417	C	0.222	1.083		A	0.4219	0.4604	C	0.05732	0.8556		A	0.4387	0.4622	C	0.2271	0.9094
rs1573411	18	48621410	3	WGAtop3000associatedWTCCC	0.1306	A	G	0.8277	1.009	0.9282	1.098		0.06901	1.067	0.995	1.143		A	0.4799	0.435	G	0.004383	1.198		A	0.4413	0.4336	G	0.6331	1.032		A	0.4628	0.4806	G	0.3817	0.9312		A	0.4648	0.4465	G	0.3479	1.077
rs1025099	18	49598267	1	WGAtop2000_noWTCCCassoc	0.1535	G	A	0.4406	1.033	0.9508	1.123		0.02082	1.085	1.012	1.162		G	0.5193	0.4726	A	0.003045	1.206		G	0.4855	0.4953	A	0.5429	0.9614		G	0.5191	0.4916	A	0.1754	1.116		G	0.4864	0.4728	A	0.486	1.056
rs1214040	18	52662929	1	WGAtop2000_noWTCCCassoc	0.8698	G	A	0.3704	0.9531	0.8581	1.059		0.0234	0.9042	0.8288	0.9865		G	0.1802	0.2181	A	0.002891	0.7879		G	0.1934	0.1971	A	0.7735	0.9767		G	0.1975	0.1932	A	0.7897	1.028		G	0.1926	0.2083	A	0.3169	0.9065
rs7238081	18	57745245	3	WGAtop3000associatedWTCCC	0.8924	A	G	0.6791	0.9801	0.8913	1.078		0.2731	1.045	0.9659	1.13		A	0.2754	0.2382	G	0.006558	1.216		A	0.2666	0.2611	G	0.7003	1.029		A	0.2545	0.2677	G	0.4602	0.9338		A	0.2461	0.2561	G	0.5559	0.9482
rs8099053	18	64064307	1	WGAtop2000_noWTCCCassoc	1	G	A	0.8029	0.9892	0.9086	1.077		0.05625	0.9335	0.8699	1.002		G	0.3681	0.4134	A	0.003304	0.8264		G	0.3949	0.3913	A	0.8195	1.015		G	0.3885	0.3885	A	0.9989	0.9999		G	0.4056	0.4183	A	0.5098	0.949
rs2174893	18	72532863	1	WGAtop2000_noWTCCCassoc	0.5007	G	A	0.5177	0.9602	0.8489	1.086		0.2424	1.061	0.9606	1.173		G	0.1671	0.1343	A	0.003234	1.293		G	0.1215	0.1237	A	0.836	0.9798		G	0.1453	0.1443	A	0.9442	1.008		G	0.1274	0.1411	A	0.3076	0.8889
rs9961447	18	74302877	3	WGAtop3000associatedWTCCC	0.1962	G	A	0.05223	1.119	0.9989	1.253		0.001123	1.168	1.064	1.283		G	0.1804	0.1466	A	0.003427	1.281		G	0.1664	0.1422	A	0.03627	1.205		G	0.1329	0.1333	A	0.9739	0.9961		G	0.1975	0.1808	A	0.2728	1.115
rs2396293	19	476739	1	WGAtop2000_noWTCCCassoc	0.4386	G	A	0.4653	0.9589	0.8568	1.073		0.02043	0.8958	0.8162	0.9832		G	0.1568	0.1928	A	0.002969	0.7783		G	0.163	0.1737	A	0.3779	0.9262		G	0.1504	0.1667	A	0.3248	0.8854		G	0.202	0.1944	A	0.6301	1.049
rs4804075	19	8639516	1	WGAtop2000_noWTCCCassoc	0.8084	A	G	0.1471	1.075	0.975	1.185		0.004919	1.122	1.035	1.215		A	0.2712	0.2314	G	0.003323	1.236		A	0.2514	0.235	G	0.2359	1.093		A	0.2128	0.2318	G	0.2645	0.8962		A	0.2675	0.2272	G	0.0161	1.242
rs3745255	19	10529452	1	WGAtop2000_noWTCCCassoc	0.723	A	G	0.001311	0.8623	0.7878	0.944		0.2906	0.9608	0.8922	1.035		A	0.3539	0.3104	G	0.003273	1.217		A	0.3087	0.3262	G	0.2472	0.9225		A	0.2968	0.3068	G	0.5949	0.954		A	0.277	0.3532	G	3.798e-005	0.7017
rs434815	19	18028003	2	WGArepli_ImmuneGenes	0.7066	A	G	0.2941	0.9455	0.8515	1.05		0.03953	0.9119	0.8352	0.9956		A	0.1671	0.1942	G	0.02658	0.8323		A	0.1865	0.1967	G	0.4228	0.936		A	0.2095	0.2096	G	0.9935	0.9992		A	0.1891	0.2036	G	0.3535	0.9123
rs7125	19	18149069	2	WGArepli_ImmuneGenes	0.8893	A	G	0.05693	0.9222	0.8484	1.002		0.002892	0.9003	0.8401	0.9647		A	0.4479	0.4884	G	0.01029	0.8501		A	0.4696	0.485	G	0.3421	0.9403		A	0.4324	0.474	G	0.04009	0.8456		A	0.4883	0.4983	G	0.6081	0.9607
rs2232965	19	18287950	3	WGAtop3000associatedWTCCC	0.26	A	G	0.8003	0.9867	0.8897	1.094		0.1754	1.06	0.9742	1.154		A	0.2404	0.2039	G	0.005063	1.235		A	0.2109	0.2017	G	0.4811	1.058		A	0.1802	0.2026	G	0.1635	0.865		A	0.2072	0.2079	G	0.964	0.9957
rs4932855	19	23355971	2	WGArepli_ImmuneGenes	0.03096	C	A	0.6632	1.028	0.9089	1.162		0.3974	0.9561	0.8617	1.061		C	0.1035	0.1273	A	0.01961	0.7913		C	0.1319	0.1305	A	0.9007	1.012		C	0.1115	0.1432	A	0.02134	0.7506		C	0.1537	0.1167	A	0.004872	1.375
rs7250772	19	34716613	1	WGAtop2000_noWTCCCassoc	0.2383	A	G	0.9596	1.002	0.9117	1.102		0.09362	1.069	0.9888	1.156		A	0.2938	0.2528	G	0.003481	1.229		A	0.2673	0.2685	G	0.9322	0.9938		A	0.2257	0.2333	G	0.657	0.9579		A	0.2856	0.2727	G	0.4621	1.066
rs580971	19	39295306	1	WGAtop2000_noWTCCCassoc	0.3759	A	G	0.4863	0.9699	0.8898	1.057		0.02006	0.9187	0.8553	0.9868		A	0.347	0.3921	G	0.003212	0.8242		A	0.3833	0.3752	G	0.6041	1.035		A	0.386	0.388	G	0.9188	0.9915		A	0.3317	0.3722	G	0.03061	0.8371
rs1433110	19	44753134	2	WGArepli_ImmuneGenes	0.09009	G	A	0.3881	1.046	0.9439	1.16		0.03261	1.098	1.008	1.196		G	0.2159	0.1825	A	0.007342	1.234		G	0.2037	0.1921	A	0.364	1.076		G	0.202	0.1934	A	0.5939	1.056		G	0.2111	0.218	A	0.6664	0.9597
rs887391	19	46677464	1	WGAtop2000_noWTCCCassoc	0.4634	G	A	0.5034	0.9667	0.8753	1.068		0.2623	1.048	0.9655	1.138		G	0.2445	0.2062	A	0.003339	1.246		G	0.2272	0.2486	A	0.1231	0.8888		G	0.2185	0.2062	A	0.4599	1.076		G	0.2325	0.2308	A	0.9189	1.009
rs1878047	19	56465614	2	WGArepli_ImmuneGenes	0.8517	G	A	0.469	0.9686	0.8883	1.056		0.03017	0.9236	0.8595	0.9924		G	0.331	0.3734	A	0.005004	0.8301		G	0.3764	0.3737	A	0.8666	1.011		G	0.3502	0.3601	A	0.6108	0.9577		G	0.3492	0.3682	A	0.3127	0.9208
rs11700048	20	6033006	1	WGAtop2000_noWTCCCassoc	0.7566	G	A	0.8523	1.009	0.9186	1.108		0.07407	1.073	0.9931	1.16		G	0.2918	0.2511	A	0.003451	1.229		G	0.2901	0.2742	A	0.274	1.082		G	0.2691	0.2729	A	0.8345	0.9811		G	0.2398	0.2533	A	0.4222	0.9296
rs6039109	20	8174894	3	WGAtop3000associatedWTCCC	0.1163	A	C	0.3926	1.04	0.951	1.136		0.02582	1.087	1.01	1.17		A	0.3486	0.3087	C	0.006901	1.198		A	0.337	0.3237	C	0.3802	1.062		A	0.2995	0.3104	C	0.5615	0.95		A	0.3314	0.3139	C	0.3378	1.083
rs6109533	20	12672326	1	WGAtop2000_noWTCCCassoc	0.08021	G	A	0.3507	0.9501	0.8532	1.058		0.0144	0.8945	0.8181	0.9781		G	0.1677	0.2036	A	0.003819	0.7884		G	0.1816	0.1881	A	0.606	0.9578		G	0.1926	0.2026	A	0.536	0.9386		G	0.1673	0.175	A	0.6026	0.9473
rs6109534	20	12675209	1	WGAtop2000_noWTCCCassoc	0.03394	A	G	0.3636	0.9517	0.8553	1.059		0.01404	0.8947	0.8187	0.9778		A	0.169	0.2057	G	0.003193	0.7854		A	0.1844	0.1903	G	0.6423	0.9621		A	0.1993	0.2078	G	0.6045	0.949		A	0.1683	0.1778	G	0.5223	0.9358
rs6041595	20	12678872	1	WGAtop2000_noWTCCCassoc	0.08097	A	G	0.3516	0.9502	0.8535	1.058		0.01279	0.8929	0.8166	0.9762		A	0.1671	0.2039	G	0.00295	0.7831		A	0.1823	0.1886	G	0.6175	0.9592		A	0.1937	0.2043	G	0.5151	0.9357		A	0.1683	0.1758	G	0.6139	0.9489
rs6033531	20	12793707	3	WGAtop3000associatedWTCCC	0.5011	G	A	0.3384	0.9597	0.8823	1.044		0.3942	1.031	0.9614	1.105		G	0.4563	0.4103	A	0.00317	1.206		G	0.4287	0.4299	A	0.9389	0.995		G	0.4108	0.4214	A	0.5995	0.9576		G	0.429	0.4506	A	0.2667	0.9162
rs6135590	20	15820539	1	WGAtop2000_noWTCCCassoc	0.2128	A	G	0.07929	0.8698	0.7443	1.016		0.002109	0.8162	0.717	0.9292		A	0.06748	0.09318	G	0.003319	0.7043		A	0.0816	0.07844	G	0.718	1.044		A	0.05405	0.0849	G	0.003941	0.616		A	0.08366	0.09167	G	0.4713	0.9047
rs6081940	20	20186324	1	WGAtop2000_noWTCCCassoc	0.8062	G	A	0.3013	0.9568	0.8801	1.04		0.01279	0.9155	0.8541	0.9814		G	0.4072	0.4538	A	0.002956	0.8269		G	0.4441	0.4467	A	0.8693	0.9893		G	0.4334	0.4453	A	0.555	0.9528		G	0.4669	0.4866	A	0.3135	0.9241
rs6103555	20	42063880	1	WGAtop2000_noWTCCCassoc	0.04887	A	G	0.1449	0.9358	0.856	1.023		0.005715	0.9007	0.8363	0.9701		A	0.2912	0.335	G	0.00296	0.8158		A	0.3237	0.3337	G	0.5099	0.9555		A	0.3375	0.3307	G	0.7246	1.031		A	0.2899	0.3244	G	0.05635	0.85
rs1204759	20	49190813	1	WGAtop2000_noWTCCCassoc	0.01589	A	G	0.547	0.9747	0.8965	1.06		0.2929	1.038	0.9685	1.112		A	0.4916	0.4451	G	0.003116	1.205		A	0.4544	0.4699	G	0.3371	0.9395		A	0.4647	0.4838	G	0.3474	0.9261		A	0.4689	0.4559	G	0.5049	1.054
rs2205453	21	16285114	1	WGAtop2000_noWTCCCassoc	0.2672	G	A	0.648	0.9805	0.9011	1.067		0.1908	1.048	0.977	1.124		G	0.4312	0.386	A	0.003437	1.206		G	0.404	0.4145	A	0.5117	0.9577		G	0.4312	0.3969	A	0.0859	1.152		G	0.4018	0.4344	A	0.09046	0.8742
rs2825399	21	19470131	1	WGAtop2000_noWTCCCassoc	0.2238	A	G	0.9046	1.005	0.9203	1.098		0.1065	1.062	0.9872	1.142		A	0.3636	0.3201	G	0.003496	1.214		A	0.332	0.329	G	0.8481	1.013		A	0.3296	0.3332	G	0.8512	0.9839		A	0.3249	0.3311	G	0.7353	0.9722
rs3991	21	26350127	3	WGAtop3000associatedWTCCC	0.06701	A	C	0.1419	0.9283	0.8406	1.025		0.004822	0.8886	0.8185	0.9647		A	0.2179	0.2556	C	0.005192	0.8111		A	0.2172	0.2454	C	0.04026	0.8532		A	0.2264	0.2242	C	0.8986	1.012		A	0.2242	0.2339	C	0.5552	0.9464
rs2830052	21	26387468	3	WGAtop3000associatedWTCCC	0.2086	G	A	0.6772	0.9797	0.8894	1.079		0.06127	0.9266	0.8554	1.004		G	0.2394	0.2767	A	0.007212	0.8226		G	0.2441	0.2504	A	0.6558	0.967		G	0.25	0.2375	A	0.4717	1.07		G	0.2378	0.2539	A	0.3414	0.9169
rs8129503	21	34363111	1	WGAtop2000_noWTCCCassoc	0.21	G	A	0.75	0.9804	0.868	1.107		0.177	1.071	0.9696	1.183		G	0.162	0.1301	A	0.003735	1.292		G	0.1443	0.1416	A	0.8111	1.022		G	0.1216	0.1427	A	0.1296	0.8318		G	0.1323	0.1222	A	0.4373	1.095
rs2837694	21	40832507	1	WGAtop2000_noWTCCCassoc	0.6958	G	A	0.1018	1.107	0.9801	1.25		0.7595	0.9844	0.8899	1.089		G	0.1215	0.1537	A	0.003473	0.7615		G	0.1278	0.1324	A	0.6693	0.9596		G	0.1332	0.1196	A	0.3119	1.131		G	0.165	0.1314	A	0.01431	1.307
rs2837780	21	40972828	3	WGAtop3000associatedWTCCC	0.6193	G	A	0.9781	0.9987	0.9111	1.095		0.1353	0.9436	0.8744	1.018		G	0.2706	0.3087	A	0.007985	0.8306		G	0.2964	0.3079	A	0.4388	0.9467		G	0.2902	0.2876	A	0.8938	1.013		G	0.3191	0.3059	A	0.4667	1.063
rs8133241	21	41482904	1	WGAtop2000_noWTCCCassoc	1	G	A	0.9807	1.004	0.704	1.433		0.1004	1.272	0.9542	1.695		G	0.02057	0.009852	A	0.003406	2.11		G	0.01588	0.01824	A	0.5782	0.8687		G	0.01239	0.009385	A	0.4645	1.324		G	0.01265	0.01167	A	0.8182	1.085
rs928831	22	15904203	2	WGArepli_ImmuneGenes	0.1021	G	A	0.4481	1.05	0.9253	1.192		0.4014	0.9551	0.8578	1.063		G	0.09447	0.121	A	0.007643	0.7582		G	0.1153	0.1149	A	0.9678	1.004		G	0.1345	0.1312	A	0.8108	1.029		G	0.1301	0.1187	A	0.3752	1.11
rs712964	22	17536117	1	WGAtop2000_noWTCCCassoc	0.1471	A	G	0.8946	0.9943	0.9143	1.081		0.06252	0.9358	0.8727	1.003		A	0.3814	0.4274	G	0.003083	0.8261		A	0.4365	0.4306	G	0.7154	1.024		A	0.4212	0.438	G	0.402	0.9335		A	0.4329	0.436	G	0.8705	0.9872
rs1477145	22	19710064	1	WGAtop2000_noWTCCCassoc	0.6527	A	G	0.813	0.982	0.845	1.141		0.1455	1.095	0.9692	1.236		A	0.108	0.08092	G	0.002815	1.375		A	0.08425	0.08948	G	0.5685	0.9363		A	0.05869	0.06927	G	0.2938	0.8377		A	0.1041	0.09288	G	0.3328	1.135
rs12627919	22	19722943	1	WGAtop2000_noWTCCCassoc	1	A	C	0.4428	0.9413	0.8067	1.098		0.3463	1.063	0.9363	1.207		A	0.0919	0.06721	C	0.003115	1.405		A	0.07044	0.0816	C	0.1981	0.8529		A	0.06419	0.07813	C	0.1888	0.8094		A	0.09922	0.08556	C	0.2231	1.177
rs2854095	22	21579040	1	WGAtop2000_noWTCCCassoc	0.8891	A	G	0.08313	1.076	0.9904	1.17		0.001531	1.118	1.043	1.198		A	0.4994	0.4525	G	0.002923	1.207		A	0.4882	0.4725	G	0.3293	1.065		A	0.5045	0.4839	G	0.3087	1.086		A	0.4912	0.4656	G	0.1893	1.108
rs5752620	22	26431681	1	WGAtop2000_noWTCCCassoc	0.6631	G	A	0.04709	1.154	1.002	1.329		0.0006765	1.221	1.088	1.369		G	0.1195	0.09142	A	0.003132	1.349		G	0.09945	0.09299	A	0.4968	1.077		G	0.1025	0.0875	A	0.2022	1.191		G	0.1021	0.08065	A	0.05289	1.297
rs2051582	22	35888302	2	WGArepli_ImmuneGenes	0.215	A	G	0.6694	1.022	0.9254	1.128		0.1353	1.065	0.9805	1.157		A	0.2284	0.2015	G	0.03686	1.173		A	0.2258	0.2182	G	0.5684	1.045		A	0.2274	0.233	G	0.742	0.9686		A	0.2364	0.2322	G	0.8015	1.023
rs1883602	22	42289506	3	WGAtop3000associatedWTCCC	0.8235	G	A	0.7516	0.9849	0.8961	1.082		0.05788	0.927	0.857	1.003		G	0.2429	0.2848	A	0.002775	0.8058		G	0.2431	0.2625	A	0.1692	0.9022		G	0.3041	0.2615	A	0.01873	1.234		G	0.2519	0.2709	A	0.2725	0.9067
rs1781994	23	117353531	2	WGArepli_ImmuneGenes	0.898	A	G	0.7688	0.9769	0.8359	1.142		0.3622	1.062	0.9329	1.21		A	0.1001	0.07957	G	0.03691	1.287		A	0.09867	0.09949	G	0.9374	0.9909		A	0.08188	0.09169	G	0.4349	0.8835		A	0.09535	0.09302	G	0.8573	1.028
